1       **Characterization of the habitat- and season-independent increase in fungal**  
2               **biomass induced by the invasive giant goldenrod and its impact on the**  
3                       **fungivorous nematode community**

4  
5 Paula Harkes, Lisa J.M. van Heumen, Sven J.J. van den Elsen, Paul J.W. Mooijman, Casper W.  
6 Quist, Mariëtte T. W. Vervoort, Gerrit Gort, Martijn H.M. Holterman, Joris J.M. van  
7 Steenbrugge, Johannes Helder

8  
9 *P. Harkes, L.J.M. van Heumen, S.J.J. van den Elsen, M.T.W. Vervoort, M.H.M. Holterman, J.J.M. van*  
10 *Steenbrugge, Johannes Helder (Hans.Helder@wur.nl). Laboratory of Nematology, Dept. Plant Sciences,*  
11 *Wageningen University, Droevendaalsesteeg 1, NL-6708 PB, Wageningen, the Netherlands. - P.J.W.*  
12 *Mooijman, Bioscience, Wageningen Plant Research, Droevendaalse-steeg 1, NL-6708 PB, Wageningen,*  
13 *the Netherlands. C.W. Quist, Biosystematics, Wageningen University, Droevendaalsesteeg 1, 6708 PB*  
14 *Wageningen, The Netherlands - G. Gort, Biometris, Wageningen University, Droevendaalsesteeg 1, 6708*  
15 *PB Wageningen, The Netherlands*

16  
17  
18 Corresponding author. E-mail: Hans.Helder@wur.nl

19 **Abstract**

20 Outside its native range, the invasive plant species giant goldenrod (*Solidago gigantea*) has been  
21 shown to increase belowground fungal biomass. This non-obvious effect is poorly characterized;  
22 we don't know whether it is plant developmental stage-dependent, which fractions of the fungal  
23 community are affected, and whether it is reflected in the next trophic level. To address the  
24 questions, fungal assemblages in soil samples collected from invaded and non-invaded plots in  
25 two soil types were compared. Whereas ergosterol as a marker for fungal biomass demonstrated a  
26 significant increase in fungal biomass, specific qPCR assays did not point at a quantitative shift.  
27 MiSeq-based characterization of the belowground effects of giant goldenrod revealed a local  
28 increase of mainly Cladosporiaceae and Glomeraceae. This asymmetric boost in the fungal  
29 community was reflected in a specific shift in the fungivorous nematode community. Our  
30 findings provide insight in the potential impact of invasive plants on local fungal communities.

31

32 Words: 150

33

34 **Key-words:** invasive plant species, fungal abundance, qPCR, ergosterol, habitat dependency.

## 35 **Introduction**

36 Deliberately or by accident, humans have been transferring plants all over the world for centuries.  
37 Most of the time, introduced plants will not invade native ecosystems because they are sub  
38 optimally equipped for the new environment. Exotic plants are considered naturalised once they  
39 are able to sustain self-replacing populations for at least ten years in their new non-native growth  
40 area (Pyšek et al. 2004). A subset of naturalised plants is able to spread widely and may reach  
41 high densities in their new environment. Such plants are referred to as invasive plants (Pyšek et  
42 al. 2004; Richardson et al. 2000) and can have a major impact on the invaded ecosystem's  
43 structure and processes (Vilà et al. 2011).

44 Aboveground observations have often shown that invasive plants induce a decrease in  
45 species richness of the native plant community (Hejda et al. 2009). Belowground, invasive plants  
46 can change physical conditions and the composition of soil biota. Japanese barberry (*Berberis*  
47 *tunbergii*) is an example of an invasive shrub that changed the local soil function due to its easily  
48 degradable litter, which has a high nitrogen content (Ehrenfeld et al. 2001). A second example is  
49 the Australian legume *Acacia dealbata* that forms densely patches in Northwestern Spain. In  
50 various ecosystems, the presence of this invasive plant resulted in a local increase in N,  
51 exchangeable P and overall organic matter content (Lorenzo et al. 2010). Exotic plant species  
52 have also been reported to induce changes in soil microbial community. *Chromolaena odorata*, a  
53 perennial herb from Mexico that became highly invasive in China, gave rise to a local increase in  
54 fungal biomass (Xiao et al. 2014). Comparable changes were observed for *Solidago gigantea* and  
55 *Solidago canadensis*, two *Solidago* species from Northern America that established throughout  
56 Europe and Asia. *S. gigantea* was shown to boost the local fungal community (Quist et al. 2014),  
57 whereas *S. canadensis* was demonstrated to induce a qualitative change in the local soil fungal  
58 community (Wang et al. 2018).

59 Invasive plants may even negatively affect the soil biological conditions for the native  
60 plant community, rendering the restoration of the original vegetation more difficult. The non-  
61 mycorrhizal *Brassica nigra* (black mustard), is invasive in North America and was shown to  
62 negatively affect mycorrhizal symbiosis. Thereby, making it more difficult for mycorrhizal plants  
63 - the vast majority - to establish in its vicinity (Pakpour and Klironomos 2015). Similarly, the  
64 non-mycorrhizal garlic mustard (*Alliaria petiolata*), an invasive species in North American  
65 forests, has a strong negative effect on native mycorrhizal communities, whereas in its native

66 range (Europa) this effect is much milder (Callaway and Ridenour 2004). On the contrary, the  
67 mycorrhizal *S. canadensis* releases secondary metabolites in the rhizosphere that promote the  
68 growth of its own arbuscular mycorrhiza in the invaded area (Yuan et al. 2014).

69 To study belowground effects of invasive plants, it is advantageous to select rhizomatous  
70 perennial herbs. Rhizomes are subterranean stem parts that give rise to new stems. This mode a  
71 vegetative reproduction gives rise to dense, genetically uniform stands. Perennials are preferred  
72 as shifts in microbial communities might accumulate over years (Harkes et al. 2017). Giant  
73 goldenrod (*S. gigantea*; Asteraceae) is rhizomatous perennial herb native to North America  
74 (Weber and Jakobs 2005). After its introduction in Europe as an ornamental in the 18<sup>th</sup> century  
75 (Weber 1998), it became a widespread invasive plant. *S. gigantea* can survive under a broad  
76 range of light intensities, soil moistures, temperatures, nutrient conditions and pH (Vanderhoeven  
77 et al. 2006). In its natural range, *S. gigantea* is colonized by mycorrhizal fungi (Wardle et al.  
78 2004). (Zubek et al. 2016) showed that giant goldenrod interacts with AMF outside its native  
79 range, and the mycorrhizal frequency was higher in invaded as compared to neighboring non-  
80 invaded plots. Being a rhizomatous perennial herb that forms well-nigh monoculture stands in  
81 various habitats, giant goldenrod is an auspicious species to study the effect of invasive plants on  
82 soil biota.

83 In previous studies on the belowground effects of the invasive giant goldenrod, a local  
84 increase in the overall fungal biomass was detected, both in a mesocosm experiment (Scharfy et  
85 al. 2010), and under semi-natural conditions (Quist et al. 2014; Stefanowicz et al. 2016). The  
86 total fungal biomass was assessed by ergosterol, a biochemical marker for higher fungi, or by  
87 PLFA 18:2 $\omega$ 6. Ergosterol is a valid marker for major fungal groups such as Ascomycota and  
88 Basidiomycota, but it should be noted that some fungal groups such as the Glomeromycota and  
89 the Chytridiomycota lack this sterol in their cell membranes (see *e.g.* (Weete et al. 2010)).

90 Invasive plant-induced changes in the fungal community might be mirrored among  
91 fungivorous metazoan community. Fungivorous nematodes are informative in this context as they  
92 are present at high densities in nearly any soil habitats, and as their ability to feed on fungi arose  
93 multiple times independently (Holterman et al. 2017) resulting in lineages with distinct  
94 preferences (Baynes et al. 2012; Okada and Kadota 2003). Previously, it was shown that a giant  
95 goldenrod-induced boost in fungal biomass was translated into an increase of a subset of the  
96 fungivorous nematode lineages (Quist et al. 2014).

97           The relevance of soil type and location for the impact of *S. gigantea* on fungal biomass  
98 was underlined by (Stefanowicz et al. 2016). They investigated 16 *S. gigantea*-invaded sites with  
99 two adjacent paired-plots (2 m x 2 m) at each site either in or outside a river valley. A local  
100 increase of fungal phospholipid fatty acids (PLFA) was observed in the *S. gigantea*-invaded  
101 plots, and this effect was more prominent in areas next to the river - directly exposed to fluvial  
102 processes - than in the areas just outside the river valley.

103           Here we investigated the impact of invasive *S. gigantea* on local fungal communities in  
104 more detail. First, we verified whether the *S. gigantea*-induced increase in fungal biomass was  
105 transient or long lasting. Therefore, soil samples were collected at the end of the growing season  
106 (November), whereas (Quist et al. 2014) mapped this phenomenon in September, and  
107 (Stefanowicz et al. 2016) in August. Second, ribosomal DNA-based markers were used next to  
108 ergosterol to characterize changes in the fungal community. The use of two independent markers  
109 for fungal biomass could provide a more solid basis for our findings, and fungal division-specific  
110 markers would allow us to characterize the impact qualitatively. Whereas the biomass marker  
111 ergosterol pointed at a stimulation of at least a major part of the fungal community, a general  
112 rDNA marker for fungi as well as markers for major constituents of the fungal community  
113 showed no effect of the presence of invasive *S. gigantea*. To further investigate these apparently  
114 contradictory results, ribosomal DNA amplicons were sequenced in order to investigate which  
115 fungal families were indicative for invaded plots. In addition, we checked whether  
116 representatives of the next trophic level, fungivorous nematodes, were affected. Two out of the  
117 three nematode lineages present on these sites were stimulated in the presence giant goldenrod.  
118 Possible explanations for these interesting but paradoxical results are discussed.

## 119 Material and Methods

120

### 121 Sampling sites

122 The belowground *S. gigantea* invasion effects were examined at eight sites in the Netherlands,  
 123 located in either of the distinct semi-natural habitats, namely riparian zones (rive clay soil) and  
 124 semi-natural grasslands (sandy soil). To allow for a comparison with results presented by Quist et  
 125 al. (2014), the same sampling sites were used. ‘Millingerwaard’, ‘Ewijkse Plaat’ and ‘Blauwe  
 126 Kamer’ were the selected riparian zone sites (Table 1). The other five sites, ‘Dennenkamp’,  
 127 ‘Plantage Willem III’, ‘Hollandseweg’, ‘Scheidingslaan’ and ‘Reijerscamp’, are located in semi-  
 128 natural grassland habitats on Pleistocene sandy soils (Table 1). For all invaded plots, the coverage  
 129 by *S. gigantea* was scored as a 9 on a modified Braun-Blanquet scale (Barkman et al. 1964; Leps  
 130 and Hadincova 1992) implying a 75-100% coverage. Non-invaded plots were dominated by  
 131 native plant species and fell in category 2 which means that at most 2-5 *S. gigantea* were found in  
 132 the control plots. More information on the floristic composition of these sites can be found in  
 133 (Quist et al. 2014).

134

135 **Table 1:** Eight study sites located in riparian zones and in semi-natural grassland habitats are indicated below. RC  
 136 = River clay, S = Sand and PS = Pleistocene sand. Although ‘Blauwe Kamer’ is one riparian study site, samples were  
 137 collected from two distinct areas within the nature reserve (1 and 2). Riparian zones are characterized by river clay  
 138 soils, whereas the semi-natural grassland sites were located on Pleistocene sandy soils. Coordinates and years of *S.*  
 139 *gigantea* introduction were obtained from Quist et al. (2014)

| Habitat type           | Study site          | Soil type | Coordinates                      | Year of <i>S. gigantea</i> introduction | Number of plots pairs |
|------------------------|---------------------|-----------|----------------------------------|-----------------------------------------|-----------------------|
| Riparian zone          | Millingerwaard      | RC        | 51° 51' 58.11" N 6° 00' 35.47" E | ~ 1950                                  | 8                     |
|                        | Ewijkse plaat       | RC        | 51° 52' 47.36" N 5° 44' 52.17" E | ~ 1950                                  | 8                     |
|                        | Blauwe Kamer        | RC        | 51° 56' 40.22" N 5° 36' 19.90" E | after 1950                              | 4                     |
|                        |                     | RC and S  | 51° 56' 32.56" N 5° 37' 09.54" E | after 1950                              | 4                     |
| Semi-natural grassland | Dennenkamp          | PS        | 52° 01' 45.64" N 5° 47' 53.50" E | 1982                                    | 8                     |
|                        | Plantage Willem III | PS        | 51° 58' 48.62" N 5° 31' 08.47" E | 1995                                    | 8                     |
|                        | Hollandseweg        | PS        | 51° 58' 49.89" N 5° 40' 59.84" E | before 2005                             | 4                     |
|                        | Scheidingslaan      | PS        | 51° 58' 28.60" N 5° 41' 55.40" E | unknown                                 | 4                     |
|                        | Reijerscamp         | PS        | 52° 00' 47.49" N 5° 46' 08.64" E | 2006                                    | 4                     |

## 140 **Soil sampling**

141 In total, 104 composite soil samples were collected from 52 plot-pairs in November 2014. Eight  
142 plot-pairs were selected per site for Millingerwaard, Ewijkse Plaat, Blauwe Kamer, Dennenkamp  
143 and Plantage Willem III. Four plot-pairs were sampled at the sites Hollandseweg, Scheidingslaan  
144 and Reijerscamp due to limited number of *S. gigantea* patches at these sites (see also Table 1).  
145 Each plot-pair consisted of two directly neighbouring 2 x 2 m plots to minimize possible  
146 differences in soil type and structure. To average microscale variation, 12 soil cores (depth: 25  
147 cm,  $\varnothing$  1.5 cm) were randomly collected within each plot and mixed thoroughly. Sampling  
148 material was thoroughly cleaned between plot-pairs in order to limit cross contamination. At the  
149 day of sample collection composite soil samples were split into two subsamples (200g and 5g).  
150 The 200g subsample was stored at 4°C for subsequent nematode extraction (100g) and the  
151 determination of abiotic soil characteristics (60g). Nematodes were extracted within one week  
152 after sample collection. The other subsamples (5g) were stored at -20°C to prevent DNA  
153 degradation prior to total DNA extraction, which was completed within three weeks after sample  
154 collection.

## 155 **Abiotic soil characteristics**

156 Per composite sample, subsamples were taken for the analysis of abiotic and biotic soil  
157 characteristics. Moisture content, pH, organic matter (OM) content, total carbon (C) content, total  
158 nitrogen (N) content and C:N ratio were determined. The total amount of C and N, determined  
159 with a composite sample of invaded and a composite sample of uninvaded plots per sampling  
160 site, was performed by BLGG AgroXpertus (Wageningen, The Netherlands).

161 Soil moisture content was measured per sample by determining the weight loss after 20  
162 hours at 105°C. Dried soil was sieved with a mesh of 2 mm and 10 g was added to 25 ml  
163 demineralized water for soil pH measurements using a gel-electrolyte electrode (Sentix 21,  
164 WTW, Weilheim, Germany). Organic matter content was determined by measuring weight loss  
165 of 20 g of sieved soil after 5 hours at 550°C.

166

## 167 **Fungal and bacterial extraction and community analysis**

168 Fungal and bacterial DNA was extracted from 0.25 g subsamples using the PowerSoil DNA  
169 Isolation Kit (MO BIO Laboratories, Carlsbad, California, USA). Slight changes were made to  
170 the manufacturer's protocol. PowerBead Tubes were placed in a Qiagen Tissue Lyser for 7



171 minutes instead of 10 minutes to compensate for the high shaking frequency (30 Hz), and 20  $\mu$ l  
172 of internal control DNA (20.6 ng/ $\mu$ l calf thymus DNA) was added to each sample in order to  
173 monitor DNA losses during extraction and purification. To further reduce the impact of soil-  
174 derived PCR-inhibiting components, purified lysates were diluted 100 times. Diluted samples  
175 were stored at 4 °C until further use. Undiluted purified samples were stored at -20 °C. Microbial  
176 communities were analysed using real time PCR assays targeting total fungi (ITS1F/5.8 s), total  
177 bacteria (16S ribosomal RNA) as well as three fungal phyla: Ascomycota, Basidiomycota and  
178 Chytridiomycota (based on taxon-characteristic ITS regions). PCR primers, PCR conditions, and  
179 slope and intercept values describing the relationship between Ct-values and concentration of  
180 target bacterial or fungal DNA (ng/ $\mu$ l) are essentially according to (Harkes et al. 2017) and  
181 details can be found in Supplementary table 1.

182

### 183 **Ergosterol measurements**

184 Ergosterol, a biochemical marker for higher fungi frequently used in soil ecology, was extracted  
185 from 1 g of soil using the alkaline extraction method as described by (Bååth 2001). In a mixture  
186 alkaline methanol and cyclohexane, ergosterol accumulated in the cyclohexane phase. After  
187 phase separation, the cyclohexane was removed by evaporation, and ergosterol is re-dissolved in  
188 methanol. Subsequently, high-performance liquid chromatography (HPLC) with photodiode  
189 array detection (peak identification is based on retention time and UV-spectrum) was used to  
190 separate and quantify the ergosterol contents of the samples as described by (de Ridder-Duine et  
191 al. 2006)

192

### 193 **Nematode extraction and community analysis**

194 Per composite sample, nematodes were extracted from a 100g subsample using an Oostenbrink  
195 elutriator (Oostenbrink 1960). DNA extractions of the total nematode suspensions were  
196 performed as described by (Vervoort et al. 2012). At the start of this extraction procedure, 25  $\mu$ l  
197 of calf thymus DNA (20.6 ng/ $\mu$ l) was added to each sample to be able to quantify DNA loss after  
198 extraction and purification. After purification, each sample was diluted 10 times and stored at -20  
199 °C until further use. Diluted DNA extracts served as a template for the real time PCR-based  
200 determination of the total nematode density and the densities of the three major fungivorous  
201 nematode lineages present on these locations, Aphelenchidae, Aphelenchoididae and



202 *Diphtherophora*. This qPCR detection method is based on taxon-specific SSU rDNA sequence  
203 motifs as previously described by (Vervoort et al. 2012).

204 Because of the substantial variation estimation in rDNA copy numbers in fungi, using  
205 only the ITS marker might not suffice in all fungal clades, therefore two qPCR assays for single-  
206 copy protein coding genes were included in this study (beta-tubulin (tub2) and translation  
207 elongation factor 1-alpha (tef1)) as they are supposed to be less variable and occur as a single  
208 copy in fungi (Raja et al. 2017).

209

### 210 **PCR Amplification and sequencing of fungal 16S rDNA**

211 The variable V7-V8 of fungal 18S was utilized as a target for the analyses of Illumina 18S rDNA  
212 sequencing. To prepare the samples for sequencing a twostep PCR procedure was followed as  
213 described in (Harkes et al. 2019). In brief, a locus-specific primer combination extended with an  
214 Illumina read area and the appropriate adapter were used to produce primary amplicons - in  
215 triplicate for all samples. PCR 2 was conducted on 40x diluted amplicons of PCR1 to attach the  
216 Illumina index and the Illumina sequencing adaptor. Randomly picked products of PCR 1 and 2  
217 were checked on gel to ensure amplification was successful. Finally, all PCR products were  
218 pooled and sent for sequencing. Sequencing was done at Bioscience - Wageningen Research,  
219 Wageningen, The Netherlands - using the Illumina MiSeq Desktop Sequencer (2\*250nt paired-  
220 end sequencing) according to the standard protocols. The raw sequences were submitted to the  
221 NCBI Sequence Read Archive (SRA) database under study accession numbers PRJNA563313.

222

### 223 **Combined analysis of abiotic characteristics and quantitative biotic data**

224 The impact of *S. gigantea* invasion on abiotic soil properties and the densities of nematodes,  
225 fungi and bacteria was analysed by using mixed linear models (PROC MIXED, SAS software  
226 system version 9.2, see Littell et al. (2006). When residuals did not approximate normal  
227 distributions, transformed data were used. OM, total C, total N, nematode densities and densities  
228 of fungi and bacteria were log-transformed. A constant of 0.1 was added prior to the log-  
229 transformation to bypass any zero values. This was done for Aphelenchidae, Aphelenchoididae,  
230 *Diphtherophora* and Chytridiomycota.

231 A split-plot design was used for all ten study sites, with sampling sites forming the main  
232 plots, associated with the factor habitat type (riparian vegetation or semi-natural grassland), with

233 multiple plot pairs (8 or 4) per site, and two subplots per plot pair, associated with the factor plant  
234 invasion. This design was represented in the mixed models with random effects for sites, plot-  
235 pairs and individual plots, forming the random part of the model. Main effects of habitat type,  
236 invasion and the interaction between both factors formed the fixed part of the model. Random  
237 effects for site, plot-pairs and individual plots formed the random part of the model. In this way,  
238 the total error variance was split into variance components for sites, plot-pairs within sites and for  
239 individual plots within plot-pairs. Regarding pH, the mixed model took into account that  
240 variances were different for riparian vegetation habitats and semi-natural grasslands (as was  
241 noticed from residual plots). Hypothesis tests (with F-test statistics) for the significance of the  
242 main effects of habitat type, invasion and their interaction on the soil variables were performed.  
243 P-values  $<0.05$  were considered significant. Regardless the outcome of hypothesis tests on  
244 interaction and main effects, comparisons between invaded and uninvaded plots were made per  
245 habitat type, using F-tests. The results were presented as (back transformed) 95% confidence  
246 intervals for the estimated mean responses of the soil variables (obtained from 'least squares  
247 means' outputs) in invaded and un-invaded plots per habitat type. Moreover, invasion impacts on  
248 soil variables were presented as ratios between estimated means of invaded plots and un-invaded  
249 plots.

## 250

### 251 **Bioinformatics framework and statistics**

252 The composition of the fungal communities of the soil samples was analysed based on the  
253 sequencing data obtained from the Illumina MiSeq platform. Reads were sorted into the  
254 experimental samples according to their index combination, quality trimmed by BBDUK and  
255 then merged via VSEARCH (Bushnell 2018; Rognes et al. 2016). Unique sequences were then  
256 clustered at 97% similarity by using the `usearch_global` method implemented in VSEARCH and  
257 a representative consensus sequence per *de novo* OTU was determined (Rognes et al. 2016). The  
258 clustering algorithm also performs chimera filtering to discard likely chimeric OTUs with  
259 UCHIME algorithm in *de novo* mode (Edgar et al. 2011) implemented in VSEARCH. Sequences  
260 that passed quality filtering were then mapped to a set of representative consensus sequences to  
261 generate an OTU abundance table. Representative OTU sequences were assigned to a taxonomic  
262 classification via BLAST against the Silva database (version 12.8). Sequences not belonging to  
263 fungi were discarded from the 18S fungal dataset. Low-abundance OTUs (those with an

264 abundance of <0.005% in the total data set) were discarded (Bokulich et al. 2013) prior to  
265 analysis. Samples were transformed using Hellinger transformation for all downstream analyses.

266 To investigate the indicator taxa involved in the differences in fungal communities  
267 between invasive and un-invasive, a linear discriminant analysis (Gonzalez et al.) effect size  
268 (LEfSe) was conducted in Microbiome Analyst (Dhariwal et al. 2017) to explore the differential  
269 microbial populations at family level (Segata et al. 2011). A significance level of  $\alpha \leq 0.05$  was  
270 used in this study.

271

## 272 **Results**

273

### 274 **Changes in abiotic soil characteristics upon *S. gigantea* invasion**

275 To gain insight in the abiotic environment of the *S. gigantea*-invaded sites, the soil  
276 moisture content, pH, OM content, total C content, total N content and C:N ratio were analysed.  
277 Significant changes were observed in soil moisture content, pH and OM content between *S.*  
278 *gigantea*-invaded and un-invaded plots in riparian and semi-natural grasslands sites (Table 2). In  
279 contrast, no differences were observed between invaded and un-invaded plots for the total C  
280 content, total N content and the C:N ratio (Tables 2 and 3, Figure 1).

281 Plots invaded by *S. gigantea* had a lower soil moisture content than un-invaded plots  
282 ( $F_{1,50} = 6.58$ ,  $P = 0.0134$ ; Table 2, Figure 1). This overall effect could mainly be attributed to the  
283 slightly lower moisture content of invaded plots in the riparian vegetation habitats ( $F_{1,50} = 5.79$ ,  
284  $P = 0.0199$ ; Table 3, Figure 1).

285 Riparian vegetation habitats and semi-natural grasslands differed significantly in pH  
286 ( $F_{1,6} = 92.22$ ,  $P < 0.0001$ ; Table 2). Riparian vegetation sites had a slightly alkaline soil with pH  
287 7.5, while semi-natural grasslands had a moderately acidic soil with pH 5.6 (see Table 3 for 95%  
288 confidence intervals). Overall, no effect of invasion of soil pH was detected (Table 2, Figure 1).  
289 Splitting by habitat type however, showed that for both types the pH was slightly lower in  
290 invaded plots, but only for riparian sites this difference was significant, due to the lower variance  
291 in riparian plots ( $F_{1,50} = 5.81$ ,  $P = 0.0197$ ; Table 3).

292 A significant interaction between invasion and habitat was found for OM content ( $F_{1,50} =$   
293 4.74,  $P = 0.0341$ ), indicating that the effect of invasion was habitat type-dependent (Table 2). In  
294 semi-natural grasslands, *S. gigantea*-invaded plots had a higher OM content as compared to un-

295 invaded plots ( $F_{1,50} = 8.12$ ,  $P = 0.0063$ ; Table 3, Figure 1), whereas no difference in OM content  
296 was detected between plot-pairs at riparian sites.

297

### 298 **Invasive *S. gigantea* increase fungal biomass, but not the total fungal DNA**

299 Using ergosterol as a biochemical marker for biomass of higher fungi, a strong overall effect of *S.*  
300 *gigantea* was detected ( $F_{1,48} = 21.97$ ,  $P < 0.0001$ ; Table 2). In giant goldenrod-invaded plots, a  
301 significant increase in ergosterol levels was observed for both habitat types (Tables 2 and 3). It is  
302 noted that ergosterol is an important constituent of the cell membranes of higher fungi, and as  
303 such it correlates fairly well with fungal biomass (e.g. (Newell and Fallon 1991). Using real time  
304 PCR assays, the total bacterial and total fungal communities were assessed, and no significant  
305 differences in fungal and bacterial DNA concentrations were observed, neither between invaded  
306 and non-invaded habitats, nor between the two habitat types (Table 3). Also, the two single-copy  
307 fungal protein coding genes included in this study (*tub2* and *tef1*) did not show any significant  
308 differences between invaded and uninvaded plots (data not shown).

309 Keeping in mind that ergosterol measurements predominantly reflect the presence of  
310 Ascomycota and Basidiomycota, representatives of two major distal clades within the kingdom  
311 Fungi (Weete et al. 2010), these phyla were quantified separately. In the riparian vegetation  
312 habitats, a trend was observed of Ascomycota having a higher DNA concentration in *S. gigantea*-  
313 invaded plots ( $F_{1,50} = 3.31$ ,  $P = 0.0748$ ; Table 3, Figure 1). A similar invasion effect was observed  
314 when both habitats were analysed together ( $F_{1,50} = 3.34$ ,  $P = 0.0738$ ; Table 2). It is noted that the  
315 mean DNA concentration of Basidiomycota on sandy soils was about three times higher than the  
316 DNA concentration in the river clay soils ( $F_{1,6} = 10.83$ ,  $P = 0.0166$ ; Table 2). The DNA  
317 concentrations of Basidiomycota did not differ between invaded and un-invaded plots (Tables 2  
318 and 3, Figure 1). In addition, Chytridiomycota were measured, being a fungal phylum that uses  
319 cholesterol instead of ergosterol as its major sterol, but no differences were observed between  
320 giant goldenrod-invaded and non-invaded plots. Comparison of Chytridiomycota between the  
321 two major habitats revealed no difference in DNA concentrations.

322 The overall bacterial DNA concentration tended to be slightly higher in *S. gigantea*-  
323 invaded plots ( $F_{1,50} = 3.29$ ,  $P = 0.0759$ ; Table 2, Figure 1) but there were no significant effects of  
324 habitat type (Table 3, Figure 1).

325 **Table 1. Main effects of habitat type, invasion and their interaction for the different abiotic and biotic variables analysed.** F-test  $F_{df}$  values and  
 326 corresponding P-values obtained from the mixed models are shown for each variable. Total C and N contents are expressed in g/kg dry soil. Total nematode  
 327 density, Aphelenchidae, Aphelenchoididae and *Diphtherophora* are expressed in numbers (#) per 100 g dry soil. Total fungal density, Ascomycota,  
 328 Basidiomycota, Chytridiomycota and total bacterial density are expressed in  $\mu\text{g}$  DNA per 100 g dry soil. Fungal biomass expressed as mg ergosterol  $\text{kg}^{-1}$  soil. The  
 329 degrees of freedom (Crowther et al.) for *Diphtherophora* are lower than for the other variables, since this taxon was not present at two study sites (Scheidingslaan  
 330 and Reijerscamp). Regarding invasion and interaction effects, the df for total C, N and C:N ratio are lower since samples were pooled together per study site.  
 331 Significant P-values (<0.05) are indicated in bold.

| Abiotic variables                         | Habitat type |         |                  | Invasion   |         |                   | Habitat type * Invasion |         |               |
|-------------------------------------------|--------------|---------|------------------|------------|---------|-------------------|-------------------------|---------|---------------|
|                                           | $F_{df}$     | P-value |                  | $F_{df}$   | P-value |                   | $F_{df}$                | P-value |               |
| Moisture content (%)                      | $F_{1,6}$    | 2.02    | 0.2052           | $F_{1,50}$ | 6.58    | <b>0.0134</b>     | $F_{1,50}$              | 0.93    | 0.3391        |
| pH                                        | $F_{1,6}$    | 92.22   | <b>&lt;.0001</b> | $F_{1,50}$ | 2.48    | 0.1213            | $F_{1,50}$              | 0.19    | 0.6661        |
| OM content (%)                            | $F_{1,6}$    | 0.13    | 0.7343           | $F_{1,50}$ | 2.87    | 0.0965            | $F_{1,50}$              | 4.74    | <b>0.0341</b> |
| Total C (g/kg)                            | $F_{1,6}$    | 1.38    | 0.2848           | $F_{1,6}$  | 0.05    | 0.8281            | $F_{1,6}$               | 0.00    | 0.9562        |
| Total N (g/kg)                            | $F_{1,6}$    | 0.57    | 0.4803           | $F_{1,6}$  | 0.15    | 0.7090            | $F_{1,6}$               | 0.60    | 0.4692        |
| C:N ratio                                 | $F_{1,6}$    | 0.73    | 0.4267           | $F_{1,6}$  | 0.43    | 0.5378            | $F_{1,6}$               | 1.00    | 0.3568        |
| <b>Biotic variables</b>                   |              |         |                  |            |         |                   |                         |         |               |
| Total nematode density (#)                | $F_{1,6}$    | 26.69   | <b>0.0021</b>    | $F_{1,50}$ | 0.00    | 0.9758            | $F_{1,50}$              | 3.24    | 0.0780        |
| Aphelenchidae (#)                         | $F_{1,6}$    | 0.02    | 0.8962           | $F_{1,50}$ | 9.96    | <b>0.0027</b>     | $F_{1,50}$              | 3.16    | 0.0814        |
| Aphelenchoididae (#)                      | $F_{1,6}$    | 0.65    | 0.4507           | $F_{1,50}$ | 8.44    | <b>0.0054</b>     | $F_{1,50}$              | 6.92    | <b>0.0113</b> |
| <i>Diphtherophora</i> (#)                 | $F_{1,4}$    | 0.08    | 0.7930           | $F_{1,42}$ | 0.02    | 0.9007            | $F_{1,42}$              | 0.29    | 0.5945        |
| Fungal biomass (mg erg / kg)              | $F_{1,6}$    | 3.63    | 0.1055           | $F_{1,48}$ | 21.97   | <b>&lt;0.0001</b> | $F_{1,48}$              | 0.72    | 0.3990        |
| Fungal DNA ( $\mu\text{g}$ )              | $F_{1,6}$    | 0.75    | 0.4184           | $F_{1,50}$ | 2.50    | 0.1203            | $F_{1,50}$              | 0.17    | 0.6846        |
| - Ascomycota ( $\mu\text{g}$ )            | $F_{1,6}$    | 0.06    | 0.8187           | $F_{1,50}$ | 3.34    | 0.0738            | $F_{1,50}$              | 0.71    | 0.4027        |
| - Basidiomycota ( $\mu\text{g}$ )         | $F_{1,6}$    | 10.83   | <b>0.0166</b>    | $F_{1,50}$ | 0.00    | 0.9637            | $F_{1,50}$              | 0.01    | 0.9370        |
| - Chytridiomycota ( $\mu\text{g}$ )       | $F_{1,6}$    | 1.07    | 0.3405           | $F_{1,50}$ | 1.25    | 0.2693            | $F_{1,50}$              | 0.12    | 0.7340        |
| Total bacterial density ( $\mu\text{g}$ ) | $F_{1,6}$    | 0.05    | 0.8360           | $F_{1,50}$ | 3.29    | 0.0759            | $F_{1,50}$              | 0.02    | 0.8826        |

332  
333

334 **Table 3. Estimated mean response and associated 95% confidence intervals of the soil characteristics analyzed for plots invaded and un-invaded by *S.***  
 335 ***gigantea* in two habitat types.** The estimated mean response (Est. mean) and lower and upper bounds of the 95% confidence interval are shown for each  
 336 variable. Values were obtained from ‘least squares means’ outputs of mixed models fitted to the variables. For both habitat types, riparian vegetation and semi-  
 337 natural grassland, est. mean responses are shown for plots invaded and un-invaded by *S. gigantea*. Riparian vegetation habitats contained 24 plot-pairs in total,  
 338 while semi-natural grasslands contained 28 plot-pairs in total. Values for OM content, total C (g/kg dry soil), total N (g/kg dry soil), Aphelenchidae,  
 339 Aphelenchoididae, *Diphtherophora*, total fungi, Ascomycota, Basidiomycota, Chytridiomycota and total bacteria were back transformed from logarithmic values  
 340 to the original scale. Aphelenchidae, Aphelenchoididae and *Diphtherophora* are expressed in numbers (#) per 100 g dry soil. For *Diphtherophora*, 8 plot-pairs  
 341 from semi-natural grasslands were excluded from analysis. Fungal biomass expressed as mg ergosterol per kg soil. Total fungal density, Ascomycota,  
 342 Basidiomycota, Chytridiomycota and total bacterial density are expressed in  $\mu\text{g}$  DNA per 100 g dry soil. Significant P-values (<0.05) are indicated in bold.  
 343

|                                           | Riparian vegetation (n=24 plot-pairs) |             |       |                   |             |       |               | Semi-natural grassland (n=28 plot-pairs) |             |       |                   |             |       |                  |
|-------------------------------------------|---------------------------------------|-------------|-------|-------------------|-------------|-------|---------------|------------------------------------------|-------------|-------|-------------------|-------------|-------|------------------|
|                                           | Invaded (n=24)                        |             |       | Un-invaded (n=24) |             |       | P-value       | Invaded (n=28)                           |             |       | Un-invaded (n=28) |             |       | P-value          |
|                                           | Lower                                 | Est. mean   | Upper | Lower             | Est. mean   | Upper |               | Lower                                    | Est. mean   | Upper | Lower             | Est. mean   | Upper |                  |
| <b>Abiotic variables</b>                  |                                       |             |       |                   |             |       |               |                                          |             |       |                   |             |       |                  |
| Moisture content (%)                      | 15.9                                  | <b>20.7</b> | 25.6  | 16.7              | <b>21.5</b> | 26.4  | <b>0.0199</b> | 12.8                                     | <b>16.6</b> | 20.4  | 13.2              | <b>17.0</b> | 20.7  | 0.2445           |
| pH                                        | 7.33                                  | <b>7.46</b> | 7.59  | 7.37              | <b>7.50</b> | 7.63  | <b>0.0197</b> | 5.21                                     | <b>5.58</b> | 5.96  | 5.28              | <b>5.65</b> | 6.02  | 0.3059           |
| OM content (%)                            | 4.2                                   | <b>5.9</b>  | 8.3   | 4.2               | <b>5.9</b>  | 8.4   | 0.7429        | 4.3                                      | <b>5.7</b>  | 7.4   | 4.0               | <b>5.3</b>  | 6.9   | <b>0.0063</b>    |
| Total C (g/kg)                            | 17.0                                  | <b>31.2</b> | 57.0  | 16.8              | <b>30.6</b> | 56.0  | 0.9181        | 13.9                                     | <b>22.1</b> | 35.3  | 13.5              | <b>21.5</b> | 34.4  | 0.8243           |
| Total N (g/kg)                            | 0.9                                   | <b>1.7</b>  | 3.1   | 1.0               | <b>1.9</b>  | 3.4   | 0.4895        | 0.9                                      | <b>1.5</b>  | 2.3   | 0.9               | <b>1.4</b>  | 2.2   | 0.7663           |
| C:N ratio                                 | 12.9                                  | <b>19.1</b> | 25.2  | 10.6              | <b>16.8</b> | 22.9  | 0.3366        | 10.5                                     | <b>15.2</b> | 20.0  | 10.9              | <b>15.7</b> | 20.5  | 0.7879           |
| <b>Biotic variables</b>                   |                                       |             |       |                   |             |       |               |                                          |             |       |                   |             |       |                  |
| Aphelenchidae (#)                         | 0.4                                   | <b>1.6</b>  | 6.0   | 0.1               | <b>0.5</b>  | 2.0   | <b>0.0015</b> | 0.4                                      | <b>1.2</b>  | 3.6   | 0.3               | <b>0.9</b>  | 2.7   | 0.3156           |
| Aphelenchoididae (#)                      | 1.4                                   | <b>4.3</b>  | 13.0  | 0.3               | <b>1.1</b>  | 3.6   | <b>0.0004</b> | 1.6                                      | <b>4.0</b>  | 9.8   | 1.5               | <b>3.7</b>  | 9.2   | 0.8404           |
| <i>Diphtherophora</i> (#)                 | 0.4                                   | <b>0.9</b>  | 1.9   | 0.4               | <b>0.8</b>  | 1.7   | 0.7621        | 0.4                                      | <b>0.9</b>  | 2.0   | 0.5               | <b>1.1</b>  | 2.4   | 0.6564           |
| Fungal biomass (mg erg / kg)              | 1.07                                  | <b>1.75</b> | 2.85  | 0.54              | <b>0.88</b> | 1.43  | <b>0.0199</b> | 1.74                                     | <b>2.66</b> | 3.97  | 1.22              | <b>1.65</b> | 2.76  | <b>&lt;.0001</b> |
| Fungal DNA ( $\mu\text{g}$ )              | 220                                   | <b>299</b>  | 405   | 191               | <b>259</b>  | 351   | 0.1814        | 264                                      | <b>340</b>  | 438   | 243               | <b>313</b>  | 403   | 0.3925           |
| - Ascomycota ( $\mu\text{g}$ )            | 26.1                                  | <b>40.2</b> | 61.9  | 19.1              | <b>29.3</b> | 45.2  | 0.0748        | 26.9                                     | <b>38.7</b> | 55.6  | 24.0              | <b>34.5</b> | 49.5  | 0.4730           |
| - Basidiomycota ( $\mu\text{g}$ )         | 1.6                                   | <b>2.8</b>  | 5.1   | 1.6               | <b>2.8</b>  | 5.0   | 0.9818        | 5.4                                      | <b>8.8</b>  | 14.3  | 5.5               | <b>9.0</b>  | 14.5  | 0.9270           |
| - Chytridiomycota ( $\mu\text{g}$ )       | 0.4                                   | <b>0.9</b>  | 1.8   | 0.6               | <b>1.2</b>  | 2.4   | 0.3250        | 0.3                                      | <b>0.6</b>  | 1.2   | 0.4               | <b>0.7</b>  | 1.4   | 0.5709           |
| Total bacterial density ( $\mu\text{g}$ ) | 3598                                  | <b>4929</b> | 6754  | 3303              | <b>4526</b> | 6201  | 0.1875        | 3654                                     | <b>4696</b> | 6034  | 3399              | <b>4367</b> | 5612  | 0.2263           |



345 **Two fungivorous nematode families benefitted from *S. gigantea*-induced increase in fungal**  
346 **biomass**

347 The total nematode abundance, and density of the three fungivorous nematode taxa that were  
348 commonly present in both the Pleistocene sand and river clay locations were analysed to study  
349 the belowground impact of *S. gigantea* on the next trophic level of the soil food web.  
350 Representatives of the families Aphelenchidae, Aphelenchoididae and the genus *Diphtherophora*  
351 were used to determine whether and, if so, how the observed increase in biomass of higher fungi,  
352 and an unchanged fungal DNA levels are reflected in the local fungivorous nematode  
353 community.

354 Dominance by giant goldenrod did not affect the total nematode density (Table 2, Figure  
355 1). Total nematode density (per 100 g dry soil) only differed significantly between habitats. The  
356 riparian sites had an estimated mean nematode abundance about two times higher than in semi-  
357 natural grassland soils ( $F_{1,6}= 26.69$ ,  $P= 0.0021$ ; Table 2). Both Aphelenchidae ( $F_{1,50}= 9.96$ ,  $P=$   
358  $0.0027$ ) and Aphelenchoididae ( $F_{1,50}= 8.44$ ,  $P= 0.0054$ ; Table 2, Figure 1) were more abundant in  
359 *S. gigantea*-invaded plots than in un-invaded plots. A significant interactive effect between  
360 habitat type and invasion status ( $F_{1,50}= 6.92$ ,  $P=0.0113$ ) was observed for Aphelenchoididae  
361 indicating that the response to invasion was dependent on habitat type (Table 2) whereas this  
362 interactive effect between habitat type and invasion status was not significant for Aphelenchidae  
363 ( $F_{1,50}= 3.16$ ,  $P= 0.0814$ ; Table 2).

364 For both fungivorous nematode taxa, the effect of *S. gigantea* was only seen in the  
365 riparian habitats. As compared to the un-invaded plots, Aphelenchidae densities were three times  
366 higher in invaded plots in riparian habitats ( $F_{1,50}=11.30$ ,  $P=0.0015$ ; Table 3, Figure 1). Similarly,  
367 the estimated densities of Aphelenchoididae were around four times higher in *S. gigantea*-  
368 invaded riparian plots as compared to the non-invaded neighbouring plots ( $F_{1,50}=14.23$ ,  
369  $P=0.0004$ ; Table 3, Figure 1). Giant goldenrod stands did not affect the abundance of  
370 representatives of the genus *Diphtherophora* (Tables 2 and 3, Figure 1).

371

372 **Fungal indicator taxa associated with invasive *S. gigantea***

373 Invasion by *S. gigantea* resulted in a local increase in fungal biomass, but not in total fungal  
374 DNA. This remarkable observation was investigated in more detail by comparing the  
375 composition of the communities. As a crude measure for fungal DNA content we compared the



376 number of primary reads per sample. Whereas soil samples from uninvaded plots gave rise to  $\approx$   
377 95,000 (SD 39,000) reads per samples, on average  $\approx$  102,000 reads (SD 37,000) were generated  
378 from samples from invaded plots. No significant difference in number of reads per sample were  
379 found between invaded and non-invaded plots. Although it is hard to compare qPCR data with  
380 Illumina reads, the sequencing data confirm the absence of a difference in fungal DNA contents  
381 between *S. gigantea*-invaded and non-invaded plots.

382 PERMANOVA on Bray-Curtis dissimilarity profiles identified ‘habitat type’ (riparian  
383 vegetation vs. natural grassland) as the main factor responsible for the difference in fungal  
384 composition (Table 4). This factor explained  $\approx$  27% of the overall variance. The second most  
385 informative variable was ‘study site’ with an  $R^2$  value of 0.23. This is the variation in fungal  
386 communities between the various sampling sites within a habitat type. Against the substantial  
387 background variation caused by habitat type and study site, still a clear invasion effect could be  
388 discerned. Evidently, this effect explained a relatively low percentage of the overall variation,  
389 1.7%, but this contribution was highly significant. As can be seen in Table 4, analyses of fungal  
390 communities for the two habitat types separately resulted in significant effects. It is noted that  
391 effect of plant invasion on fungal assemblages was more pronounced in the semi natural  
392 grasslands ( $P=0.001$ , and  $P=0.01$  for riparian vegetation).

393 LEfSe (Linear discriminant analysis Effect Size) analysis allowed us to determine which  
394 fungal taxa contribute most to observed differences between *S. gigantea* invaded and un-invaded  
395 plots. With an LDA threshold of  $>2$  the families Cladosporiaceae, Teratosphaeriaceae (both  
396 Ascomycota), Glomeraceae (Glomeromycota) and Kondoaceae (Basidiomycota) were shown to  
397 be more abundant in plots invaded with *S. gigantea* (Figure 2A). Analysis per habitat type  
398 revealed that only the Cladosporiaceae were present in higher densities in both habitat types in  
399 invaded plots (Figure 2B and 2C). A higher abundance of members of the family  
400 Cucurbitariaceae (Ascomycota) was shown to be characteristic for the non-invaded plots.

401

402 **Table 4:** Summary PERMANOVAs on Bray-Curtis dissimilarity profiles of the fungal biome for the main effect and  
403 each habitat type. The effects of the following variables on the quantitative taxonomic composition of fungi were  
404 tested: Habitat type (Riparian Vegetation/Semi natural grassland), Study site (RV=3 SG=5), Invasion  
405 (Invaded/Uninvaded) and the interactions between Invasion and Habitat Type or Study Site. Differences are  
406 considered significant if  $P < 0.01$ .  $P$  = probability associated with the Pseudo F statistic. Significant  $P$  values in bold.

|                       | Main effect |               | Riparian Vegetation |               | Semi-natural grassland |               |
|-----------------------|-------------|---------------|---------------------|---------------|------------------------|---------------|
|                       | R2          | P             | R2                  | P             | R2                     | P             |
| Habitat Type          | 0.225       | <b>0.0001</b> |                     |               |                        |               |
| Study site            | 0.237       | <b>0.0001</b> | 0.257               | <b>0.0001</b> | 0.354                  | <b>0.0001</b> |
| Invasion              | 0.018       | <b>0.0024</b> | 0.037               | <b>0.0050</b> | 0.032                  | <b>0.0001</b> |
| Study site * Invasion | 0.033       | 0.3964        | 0.032               | 0.4252        | 0.053                  | 0.2181        |
| Habitat * Invasion    | 0.009       | 0.0523        |                     |               |                        |               |

407

## 408 **Discussion**

409 The aim of this research was to characterize quantitative and qualitative shifts in the fungal  
410 community brought about by the invasive plant species *S. gigantea*. To assess the impact of this  
411 invasive plant species on below-ground fungal biomass, two kinds of components of the fungal  
412 cell membranes (either ergosterol or the fatty acid 18:2 $\omega$ 6) have been used. Consistently, *i.e.*  
413 during multiple growth stages, over multiple years, and at multiple location invasive giant  
414 goldenrod was shown to induce a local increase in fungal biomass (Quist et al. 2014; Stefanowicz  
415 et al. 2016). However, both a qPCR-based approach and an Illumina-based characterisation of  
416 fungal communities pointed at the absence of a quantitative shift in total fungal biomass. The  
417 observed *S. gigantea*-induced local increase in fungal biomass combined with the unaltered  
418 presence of fungal DNA prompted us to suggest that invasion of *S. gigantea* locally induced an  
419 increase in fungal biomass:DNA ratio. Qualitative characterization of the fungal assemblages  
420 revealed that *S. gigantea* invasion was accompanied by a local increase in abundance of members  
421 of the families Cladosporiaceae and Glomeraceae, and a decreased presence of Cucurbitariaceae.

422 To further investigate these apparently contradictory results, we focussed on  
423 representatives of the next trophic level; three fungivorous nematode taxa that were commonly  
424 present in both soil types. The densities of the fungivorous Aphelenchidae and Aphelenchoididae  
425 increased in *S. gigantea*-invaded plots, while the abundance of the members of the fungivorous  
426 genus *Diphtherophora* did not change. Moreover, we suggest that distinct food preferences  
427 explain why only for two out of three commonly present fungivorous nematode lineages an  
428 increase in density was observed. Arguments underlying this interpretation of our results are  
429 presented below.

430

### 431 **Apparent discrepancy between results from independent fungal biomass markers**

432 Notably, the observed increase in ergosterol in *S. gigantea*-invaded plots was not accompanied  
433 by a comparable local augmentation of the total fungal DNA (Fig.1). In case of the phylum  
434 Ascomycota, a trend towards more rDNA in invaded plots was detected (Table 3, P= 0.0748).  
435 With regard to the Basidiomycota, it is noted that the apparent low density (Table 3) might be an  
436 underestimation as relatively high rDNA copy representatives were used to generate the  
437 calibration lines (Harkes et al. 2017; Lofgren et al. 2019).

438 Ergosterol is a frequently used marker for the assessment of fungal biomass in soil. It is sterol  
439 found in all Ascomycota and most Basidiomycota. Several representatives of the Zygomycota  
440 harbor ergosterol in their membranes as well, but this sterol is absent in the more basal fungal  
441 lineages (Weete et al. 2010). Using cultures of 6 non-basal fungal species (Montgomery et al.  
442 2000) showed a tight correlation between ergosterol content and fungal biomass. Provided that  
443 local fungal community was dominated by later diverging divisions such as Ascomycota and  
444 Basidiomycota (as suggested by e.g. (Hannula et al. 2017)), ergosterol could be a reliable marker  
445 for fungal biomass.

446 With regard to the use of rDNA as a marker for fungal biomass, it should be mentioned that a  
447 genome-based survey revealed considerable variation estimation in rDNA copy numbers.  
448 Nevertheless, some phylum-specific characteristics have been observed. The average number of  
449 rDNA copies for Ascomycota is around 50 and shows limited variation. Basidiomycota harbor  
450 about twice as many rDNA copies, and this is accompanied by substantial variation among its  
451 members (Lofgren et al. 2019). Hence, rDNA copy numbers can only be used to assess fungal  
452 biomass in case there are no major differences between the community composition of the  
453 samples, and rDNA-based estimation of the Ascomycota is likely to be more accurate than the  
454 estimation of the Basidiomycota biomass.

455 Hence, although both ergosterol and rDNA copy number have their limitations as fungal  
456 biomass markers in soil, comparison of data from adjacent plots from the same habitat are  
457 probably valid. Fungi are known to be more flexible with regard to the biomass:DNA ratio than  
458 many other organismal groups (e.g. (Griffiths et al. 1997)). This is the result of the flexible  
459 cellular organization of fungi. The hyphal compartmentalization of fungi might be impaired by  
460 the partial or complete removal of septa, cross walls separating the fungal cells (Roper et al.  
461 2011). Hence, growth of the mycelial network does not necessarily be accompanied by a  
462 comparable increase in the number of nuclei. Therefore, the difference in outcome between the  
463 two types of markers (biochemical or DNA-based) might be attributable to an increase in the  
464 fungal biomass:DNA ratio. Further research is required to investigate this hypothesis.

465

#### 466 **The habitat (in)dependent impact of *S. gigantea* on fungivorous nematode lineages**

467 Due to the apparently contradictory results obtained by the two types of fungal biomass  
468 markers, the effects of *S. gigantea* on major representatives of the next trophic level, fungivorous

469 nematodes, were checked. Two out of three lineages of fungivores present both in the riparian  
470 zone and in the semi-natural grassland sites, Aphelenchoididae and Aphelenchidae, were shown  
471 to be stimulated in the presence of giant goldenrod, whereas the third lineages, the genus  
472 *Diphtherophoridae*, was unaffected by this invasive plant species. Moreover, the effect in the  
473 riparian habitats was much more pronounced than the effects in the sandy locations.

474 While the increase in Aphelenchoididae as a results of giant goldenrod invasion was  
475 found previously (Quist et al. 2014), the increase in Aphelenchidae was new. This difference may  
476 be explained by the seasonal fluctuations of nematode densities. Bulk soil concentrations of  
477 Aphelenchidae, Aphelenchoididae, and *Diphtherophora* were shown to have a distinct, taxon-  
478 dependent seasonality (Vervoort et al. 2012). In this research, samples were collected in late  
479 autumn, while samples analyzed in (Quist et al. 2014) were collected in early autumn. Hence it is  
480 conceivable that the *S. gigantea*-induced increase in Aphelenchoididae is only noticeable late in  
481 the season.

482 A pronounced boost of Aphelenchoididae and Aphelenchidae was observed in river clay  
483 soil, and a non-significant increase in sandy soils (e.g. Fig.1). This difference in response might  
484 be explainable by the soil texture-dependent species representation for each of these two families.  
485 Within the family Aphelenchoididae, the genus *Aphelenchoides* is dominant, and it comprises  
486 >100 predominantly fungivorous species. At least 30 species have been described for the  
487 constituting genera of the family Aphelenchidae, *Aphelenchus* and *Paraphelenchus*. No data on  
488 soil texture preference are available for *Aphelenchus*, *Paraphelenchus* or *Aphelenchoides*. We  
489 hypothesize that the species composition of families Aphelenchidae and Aphelenchoididae  
490 differed between the two main habitats. Apparently, the *Aphelenchoides* species present in the  
491 river clay soil could benefit more from the local increase in fungal biomass, than the  
492 *Aphelenchoides* species present in the sandy soils. We propose the same line of reasoning for the  
493 Aphelenchidae genera *Aphelenchus* and *Paraphelenchus*.

494 Hence, apparently contradictory results with regard to the impact of the invasive plant  
495 species *S. gigantea* on the fungal community, translated in a paradoxical effect on the  
496 fungivorous nematode community. In fact, only members of the families Aphelenchoididae and  
497 Aphelenchidae in riparian habitats benefitted from the presumed increase in fungal biomass.  
498 Representatives of the genus *Diphtherophoridae* were unaffected by the presence of giant

499 goldenrod. We hypothesize that this difference in response could be caused by a difference in  
500 food preference between the lineages (Li et al. 2014; Okada and Kadota 2003; Ruess et al. 2000).  
501 It is noted that the fungivorous nematode densities reported in this study are relatively low. This  
502 could be a late season sampling effect. This effect has little impact on the current analyses as  
503 differences between uninvaded and invaded plots are considered rather than absolute changes.

504

#### 505 **Effect of habitat-characteristic abiotic differences between habitat-type**

506 Despite the differences in floristic composition, soil type and land use history between the  
507 riparian zone and the semi-natural grasslands (Quist et al. 2014), the overall biotic impact of giant  
508 goldenrod induced similar overall invasion effects. Nevertheless, Basidiomycota were more  
509 abundant in semi-natural grasslands than in the riparian zones ( $P= 0.017$ , Table 2). This could  
510 relate to a substantial pH difference. Whereas riparian zones had a relative neutral pH of 7.5,  
511 semi-natural grasslands had a nearly 2 units lower pH. As compared to bacteria, pH windows for  
512 optimal growth are wider for fungi (Rousk et al. 2010). In a more recent study, Zhang et al.  
513 (2016) investigated fungal communities in arctic soils with a pH range of over 2.5 units. In the  
514 most acidic sites, Basidiomycota showed a higher relative abundance as compared to sites with  
515 more basic soils. It is noted that the higher abundance in Basidiomycota in semi-natural  
516 grasslands did not result in a significant change in either of the fungivorous nematode lineages.

517

#### 518 **Fungal indicator taxa related to invasion with *S. gigantea***

519 As shown in Fig. 2, the Ascomycete family Cladosporiaceae was one of the main families  
520 responsible for the *S. gigantea*-induced shift in fungal community composition. A closer look at  
521 the Cladosporiaceae OTUs revealed that *Cladosporium* was the dominant genus within this  
522 family.

523 *Cladosporium* is a fairly speciose genus, it comprises 189 species that are mostly saprotrophic  
524 but it also harbors some plant pathogens (Sandoval-Denis et al. 2016). Although in its native  
525 range leaves of showy goldenrod (*Solidago speciosa*) were shown to be infested by  
526 *Cladosporium asterum* causing brown rust pustules (website Missouri Botanical Garden (USA)),  
527 no information was found on *Cladosporium* being an important (Geisen et al.) pathogen of *S.*  
528 *gigantea* in Europe.

529           Recently (Koyama et al. 2019) studied root-inhabiting fungi in a wide range of native and  
530 exotic plant species in Canada. The plant selection included *Solidago canadensis*, in this context  
531 a native plant species. Ascomycota dominated the root-associated fungal communities, and  
532 within this division the Dothideomycetes – a class that includes the family Cladosporiaceae –  
533 were identified as the second most dominant class. From the overview of 27 plant species, the  
534 Cladosporiaceae abundances were in general negatively correlated with plant abundances, and the  
535 authors identified *Cladosporium delicatulum* as an endophytic plant pathogen to a substantial  
536 fraction of the plant species under investigation. In our research we focused on another *Solidago*  
537 species, outside its native range. In accordance with (Koyama et al. 2019) Cladosporiaceae was  
538 identified as an abundant fungal family in the two habitat types under investigation. However, an  
539 opposite, positive correlation between Cladosporiaceae and *Solidago gigantea* was observed in  
540 this study. Plant growth-promoting characteristics of a members of the genus *Cladosporium*  
541 could be marked as a possible benefit for *S. gigantea* associated with the fostering *Cladosporium*  
542 in its rhizosphere. Both *Cladosporium sphaerospermum* and *Cladosporium sp.* MH-6 were found  
543 to produced and release several types of gibberellins, which could explain their plant growth  
544 promoting characteristics (Hamayun et al. 2010; Paul and Park 2013).

545           Glomeraceae was the second most indicative family regarding the impact of *S. gigantea*  
546 on the local fungal community. Glomeraceae is a family of arbuscular mycorrhizal (AM) fungi  
547 and members of this family colonize the roots of a wide range of vascular plants including *S.*  
548 *gigantea* (Pirozynski and Dalpe 1989). (Vallino et al. 2006) characterized the AMF colonization  
549 of *S. gigantea* outside its native range, and identified *Glomus*, a genus belonging to the  
550 Glomeraceae, the dominant root colonizing AMF. This result underlines that invasive *S. gigantea*  
551 can recruit local AMF, and establish such a successful interaction that it ends up as one of the  
552 main fungal taxa typifying the community shift that was brought about by the invasive plant  
553 species.

554           In both habitat types, uninvaded plots were characterized by an increased presence of  
555 Cucurbitariaceae, just like the Cladosporiaceae a family that belongs to the class  
556 Dothideomycetes.

557 Little is known about the ecology of Cucurbitariaceae. Its members are known as saprobes on  
558 relatively recalcitrant organic materials such as wood, bark and leaves (Jaklitsch et al. 2018).



559 High-throughput sequencing revealed multiple fungal families as indicative for invasion.  
560 In the previous section we hypothesize that this difference in response could be caused by a  
561 difference in food preference between the lineages. Interestingly (Ruess et al. 2000) indicated  
562 *Cladosporium* as moderate feeding source for *Aphelenchoidides* sp, which is in line with our  
563 observations. Unfortunately, little is known about food preferences of different nematode taxa.  
564 Therefore, the indicator families observed in this research could be an interesting starting point  
565 for more targeted research to nematode feeding preferences. Especially the fungal families  
566 indicated for invasion in riparian habitat could be informative as Aphelenchidae and  
567 Aphelenchoididae showed a high significant increase in these soils.

568

## 569 **Conclusion**

570 This study shows that *S. gigantea* invasion has a structural impact on the belowground soil  
571 community by increasing the fungal biomass independent of sampling moment, sampling year or  
572 habitat. The increase of fungal biomass is reflected in the next trophic level by a boost of two  
573 independent lineages of fungivorous nematodes, Aphelenchidae and Aphelenchoididae. Notably,  
574 this effect is more pronounced in the river clay soils in riparian zone than in the soil soils under  
575 the semi-natural grasslands. Nematodes show strong preferences for certain soil textures, even at  
576 species level. Therefore, we hypothesize that the different response levels might be contributable  
577 to differences of the species composition of Aphelenchidae and Aphelenchoididae fungivores in  
578 the two major habitats. Another fungivorous family, *Diphtherophoridae*, did not benefit from the  
579 local, *S. gigantea*-induced increase in fungal biomass.

580 The ergosterol-based observation of the increase in the fungal biomass a *S. gigantea*,  
581 could not be confirmed by DNA markers. Both qPCR-based assessment of total fungal DNA as  
582 well as the characterization of the fungal communities on the basis of variable 18S rDNA regions  
583 did not reveal a difference in fungal DNA contents between *S. gigantea*-invaded and non-invaded  
584 plots. The apparent discrepancy might be attributable to a change in DNA:biomass ratio. High  
585 throughput sequencing of the variable 18S rDNA regions V7-V8 revealed an increased  
586 abundance of Cladosporiaceae and Glomeraceae, and a decrease of the Cucurbitariaceae. Further  
587 investigation of the nature of these community shifts could further elucidate the change fungal  
588 DNA-biomass ratio as potentially provoked by the invasive plant species *S. gigantea*.

589 **Acknowledgment**

590 We would like to acknowledge Natuurmonumenten, Staatsbosbeheer, Utrechts Landschap, the  
591 municipality of Wageningen and Reinaerde groenbeheer for allowing us to sample on their  
592 properties. We thank Herman Meurs (Unifarm, WUR) for his help during the OM content  
593 analysis and Eurofins Agro for analysing the soil C and N contents. This research was financially  
594 supported by the BE Basic Foundation, grant FS03.001.

595 **References**

- 596 Bååth E (2001) Estimation of fungal growth rates in soil using C-14-acetate incorporation into ergosterol. *Soil Biol*  
597 *Biochem* 33: 2011-2018. doi: 10.1016/S0038-0717(01)00137-7.
- 598 Barkman JJ, Doing H, Segal S (1964) Kritische bemerkungen und vorschläge zur quantitativen Vegetationsanalyse.  
599 *Acta Bot Neerl* 13: 394-419.
- 600 Baynes MA, Russell DM, Newcombe G, Carta LK, Rossman AY, Ismaiel A (2012) A mutualistic interaction  
601 between a fungivorous nematode and a fungus within the endophytic community of *Bromus tectorum*.  
602 *Fungal Ecol* 5: 610-623. doi: 10.1016/j.funeco.2012.03.004.
- 603 Bokulich NA, Subramanian S, Faith JJ, Gevers D, Gordon JI, Knight R, et al. (2013) Quality-filtering vastly  
604 improves diversity estimates from Illumina amplicon sequencing. *Nat Methods* 10: 57-59. doi:  
605 10.1038/nmeth.2276.
- 606 Bushnell B (2018), BBMap: short read aligner and other bioinformatic tools v36.99  
607 <https://sourceforge.net/projects/bbmap/>.
- 608 Callaway RM, Ridenour WM (2004) Novel weapons: invasive success and the evolution of increased competitive  
609 ability. *Front Ecol Environ* 2: 436-443. doi: 10.1890/1540-9295(2004)002[0436:Nwisat]2.0.Co;2.
- 610 de Ridder-Duine AS, Smant W, van der Wal A, van Veen JA, de Boer W (2006) Evaluation of a simple, non-alkaline  
611 extraction protocol to quantify soil ergosterol. *Pedobiologia* 50: 293-300. doi:  
612 10.1016/j.pedobi.2006.03.004.
- 613 Dhariwal A, Chong J, Habib S, King IL, Agellon LB, Xia J (2017) MicrobiomeAnalyst: a web-based tool for  
614 comprehensive statistical, visual and meta-analysis of microbiome data. *Nucleic Acids Res* 45: W180-  
615 W188. doi: 10.1093/nar/gkx295.
- 616 Edgar RC, Haas BJ, Clemente JC, Quince C, Knight R (2011) UCHIME improves sensitivity and speed of chimera  
617 detection. *Bioinformatics* 27: 2194-2200. doi: 10.1093/bioinformatics/btr381.
- 618 Ehrenfeld JG, Kourtev P, Huang W (2001) Changes in soil functions following invasions of exotic understory plants  
619 in deciduous forests. *Ecol Appl* 11: 1287-1300. doi: 10.2307/3060920.
- 620 Griffiths BS, Díaz-Raviña M, Ritz K, McNicol JW, Ebbelwhite N, Bååth E (1997) Community DNA hybridisation  
621 and %G+C profiles of microbial communities from heavy metal polluted soils. *FEMS Microbiol Ecol* 24:  
622 103-112. doi: 10.1016/S0168-6496(97)00050-0.
- 623 Hamayun M, Khan SA, Khan AL, Rehman G, Kim YH, Iqbal I, et al. (2010) Gibberellin production and plant  
624 growth promotion from pure cultures of *Cladosporium* sp MH-6 isolated from cucumber (*Cucumis sativus*  
625 *L.*). *Mycologia* 102: 989-995. doi: 10.3852/09-261.
- 626 Hannula SE, Morrien E, de Hollander M, van der Putten WH, van Veen JA, de Boer W (2017) Shifts in rhizosphere  
627 fungal community during secondary succession following abandonment from agriculture. *ISME J* 11: 2294-  
628 2304. doi: 10.1038/ismej.2017.90.
- 629 Harkes P, Suleiman AKA, van den Elsen SJJ, de Haan JJ, Holterman M, Kuramae EE, et al. (2019) Conventional  
630 and organic soil management as divergent drivers of resident and active fractions of major soil food web  
631 constituents. *Sci Rep* 9: 13521. doi: 10.1038/s41598-019-49854-y.

- 632 Harkes P, Verhoeven A, Sterken MG, Snoek LB, van den Elsen SJJ, Mooijman PJW, et al. (2017) The differential  
633 impact of a native and a non-native ragwort species (Senecioneae) on the first and second trophic level of  
634 the rhizosphere food web. *Oikos* 126: 1790-1803. doi: 10.1111/oik.04530.
- 635 Hejda M, Pyšek P, Jarošík V (2009) Impact of invasive plants on the species richness, diversity and composition of  
636 invaded communities. *J Ecol* 97: 393-403. doi: 10.1111/j.1365-2745.2009.01480.x.
- 637 Holterman M, Karegar A, Mooijman P, van Megen H, van den Elsen S, Vervoort MTW, et al. (2017) Disparate gain  
638 and loss of parasitic abilities among nematode lineages. *PLoS ONE* 12, e185445. doi:  
639 10.1371/journal.pone.0185445.
- 640 Jaklitsch WM, Checa J, Blanco MN, Olariaga I, Tello S, Voglmayr H (2018) A preliminary account of the  
641 Cucurbitariaceae. *Stud Mycol*: 71-118. doi: 10.1016/j.simyco.2017.11.002.
- 642 Koyama A, Maherali H, Antunes PM (2019) Plant geographic origin and phylogeny as potential drivers of  
643 community structure in root-inhabiting fungi. *J Ecol* 107: 1720-1736. doi: 10.1111/1365-2745.13143.
- 644 Leps J, Hadincova V (1992) How Reliable Are Our Vegetation Analyses. *J Veg Sci* 3: 119-124. doi:  
645 10.2307/3236006.
- 646 Li Y, Tsay T, Chen P (2014) Using three fungivorous nematodes to control lettuce damping-off disease caused by  
647 *Rhizoctonia solani* (AG4). *Plant Pathol Bull* 23: 43-53.
- 648 Lofgren LA, Uehling JK, Branco S, Bruns TD, Martin F, Kennedy PG (2019) Genome-based estimates of fungal  
649 rDNA copy number variation across phylogenetic scales and ecological lifestyles. *Mol Ecol* 28: 721-730.  
650 doi: 10.1111/mec.14995.
- 651 Lorenzo P, Rodriguez-Echeverria S, Gonzalez L, Freitas H (2010) Effect of invasive *Acacia dealbata* Link on soil  
652 microorganisms as determined by PCR-DGGE. *Appl Soil Ecol* 44: 245-251. doi:  
653 10.1016/j.apsoil.2010.01.001.
- 654 Montgomery HJ, Monreal CM, Young JC, Seifert KA (2000) Determination of soil fungal biomass from soil  
655 ergosterol analyses. *Soil Biol Biochem* 32: 1207-1217. doi: 10.1016/S0038-0717(00)00037-7.
- 656 Newell SY, Fallon RD (1991) Toward a method for measuring instantaneous fungal growth rates in field samples.  
657 *Ecology* 72: 1547-1559. doi: 10.2307/1940954.
- 658 Okada H, Kadota I (2003) Host status of 10 fungal isolates for two nematode species, *Filenchus misellus* and  
659 *Aphelenchus avenae*. *Soil Biol Biochem* 35: 1601-1607. doi: 10.1016/j.soilbio.2003.08.004.
- 660 Oostenbrink M (1960) Estimating nematode populations by some selected methods. *Nematology* 6: 85-102.
- 661 Pakpour S, Klironomos J (2015) The invasive plant, *Brassica nigra*, degrades local mycorrhizas across a wide  
662 geographical landscape. *R Soc Open Sci* 2: 150300. doi: 10.1098/rsos.150300.
- 663 Paul D, Park KS (2013) Identification of Volatiles Produced by *Cladosporium cladosporioides* CL-1, a Fungal  
664 Biocontrol Agent That Promotes Plant Growth. *Sensors-Basel* 13: 13969-13977. doi: 10.3390/s131013969.
- 665 Pirozynski KA, Dalpe Y (1989) Geological History of the Glomaceae with Particular Reference to Mycorrhizal  
666 Symbiosis. *Symbiosis* 7: 1-36.
- 667 Pyšek P, Richardson DM, Rejmánek M, Webster GL, Williamson M, Kirschner J (2004) Alien plants in checklists  
668 and floras: towards better communication between taxonomists and ecologists. *Taxon* 53: 131-143. doi:  
669 10.2307/4135498.

- 670 Quist CW, Vervoort MTW, Van Megen H, Gort G, Bakker J, Van der Putten WH, et al. (2014) Selective alteration  
671 of soil food web components by invasive giant goldenrod *Solidago gigantea* in two distinct habitat types.  
672 *Oikos* 123: 837-845. doi: 10.1111/Oik.01067.
- 673 Raja HA, Miller AN, Pearce CJ, Oberlies NH (2017) Fungal Identification Using Molecular Tools: A Primer for the  
674 Natural Products Research Community. *J Nat Prod* 80: 756-770. doi: 10.1021/acs.jnatprod.6b01085.
- 675 Richardson DM, Pyšek P, Rejmánek M, Barbour MG, Panetta FD, West CJ (2000) Naturalization and invasion of  
676 alien plants: concepts and definitions. *Divers Distrib* 6: 93-107.
- 677 Rognes T, Flouri T, Nichols B, Quince C, Mahé F (2016) VSEARCH: a versatile open source tool for  
678 metagenomics. *PeerJ* 4: e2584.
- 679 Roper M, Ellison C, Taylor JW, Glass NL (2011) Nuclear and genome dynamics in multinucleate ascomycete fungi.  
680 *Curr Biol* 21: R786-R793. doi: 10.1016/j.cub.2011.06.042.
- 681 Ruess L, Zapata EJG, Dighton J (2000) Food preferences of a fungal-feeding *Aphelenchoides* species. *Nematology*  
682 2: 223-230. doi: 10.1163/156854100508962.
- 683 Sandoval-Denis M, Gene J, Sutton DA, Wiederhold NP, Cano-Lira JF, Guarro J (2016) New species of  
684 *Cladosporium* associated with human and animal infections. *Persoonia* 36: 281-298. doi:  
685 10.3767/003158516x691951.
- 686 Scharfy D, Güsewell S, Gessner MO, Venterink HO (2010) Invasion of *Solidago gigantea* in contrasting  
687 experimental plant communities: effects on soil microbes, nutrients and plant–soil feedbacks. *J Ecol* 98:  
688 1379-1388. doi: 10.1111/j.1365-2745.2010.01722.x.
- 689 Segata N, Izard J, Waldron L, Gevers D, Miropolsky L, Garrett WS, et al. (2011) Metagenomic biomarker discovery  
690 and explanation. *Genome Biol* 12: R60. doi: 10.1186/gb-2011-12-6-r60.
- 691 Stefanowicz AM, Stanek M, Nobis M, Zubek S (2016) Species-specific effects of plant invasions on activity,  
692 biomass, and composition of soil microbial communities. *Biol Fert Soils* 52: 841-852. doi: 10.1007/s00374-  
693 016-1122-8.
- 694 Vallino M, Massa N, Lumini E, Bianciotto V, Berta G, Bonfante P (2006) Assessment of arbuscular mycorrhizal  
695 fungal diversity in roots of *Solidago gigantea* growing in a polluted soil in Northern Italy. *Environ*  
696 *Microbiol* 8: 971-983. doi: 10.1111/j.1462-2920.2006.00980.x.
- 697 Vanderhoeven S, Dassonville N, Chapuis-Lardy L, Hayez M, Meerts P (2006) Impact of the invasive alien plant  
698 *Solidago gigantea* on primary productivity, plant nutrient content and soil mineral nutrient concentrations.  
699 *Plant Soil* 286: 259-268.
- 700 Vervoort MTW, Vonk JA, Mooijman PJW, Van den Elsen SJJ, Van Megen HHB, Veenhuizen P, et al. (2012) SSU  
701 ribosomal DNA-based monitoring of nematode assemblages reveals distinct seasonal fluctuations within  
702 evolutionary heterogeneous feeding guilds. *PLoS ONE* 7: e47555. doi: 10.1371/journal.pone.0047555.
- 703 Vilà M, Espinar JL, Hejda M, Hulme PE, Jarosik V, Maron JL, et al. (2011) Ecological impacts of invasive alien  
704 plants: a meta-analysis of their effects on species, communities and ecosystems. *Ecol Lett* 14: 702-708. doi:  
705 10.1111/j.1461-0248.2011.01628.x.
- 706 Bååth E (2001) Estimation of fungal growth rates in soil using C-14-acetate incorporation into ergosterol. *Soil Biol*  
707 *Biochem* 33: 2011-2018. doi: 10.1016/S0038-0717(01)00137-7.

- 708 Barkman JJ, Doing H, Segal S (1964) Kritische bemerkungen und vorschläge zur quantitativen Vegetationsanalyse.  
709 Acta Bot Neerl 13: 394-419.
- 710 Baynes MA, Russell DM, Newcombe G, Carta LK, Rossman AY, Ismaiel A (2012) A mutualistic interaction  
711 between a fungivorous nematode and a fungus within the endophytic community of *Bromus tectorum*.  
712 Fungal Ecol 5: 610-623. doi: 10.1016/j.funeco.2012.03.004.
- 713 Bokulich NA, Subramanian S, Faith JJ, Gevers D, Gordon JI, Knight R, et al. (2013) Quality-filtering vastly  
714 improves diversity estimates from Illumina amplicon sequencing. Nat Methods 10: 57-59. doi:  
715 10.1038/nmeth.2276.
- 716 Bushnell B (2018), BMap: short read aligner and other bioinformatic tools v36.99  
717 <https://sourceforge.net/projects/bbmap/>.
- 718 Callaway RM, Ridenour WM (2004) Novel weapons: invasive success and the evolution of increased competitive  
719 ability. Front Ecol Environ 2: 436-443. doi: 10.1890/1540-9295(2004)002[0436:Nwisat]2.0.Co;2.
- 720 de Ridder-Duine AS, Smant W, van der Wal A, van Veen JA, de Boer W (2006) Evaluation of a simple, non-alkaline  
721 extraction protocol to quantify soil ergosterol. Pedobiologia 50: 293-300. doi:  
722 10.1016/j.pedobi.2006.03.004.
- 723 Dhariwal A, Chong J, Habib S, King IL, Agellon LB, Xia J (2017) MicrobiomeAnalyst: a web-based tool for  
724 comprehensive statistical, visual and meta-analysis of microbiome data. Nucleic Acids Res 45: W180-  
725 W188. doi: 10.1093/nar/gkx295.
- 726 Edgar RC, Haas BJ, Clemente JC, Quince C, Knight R (2011) UCHIME improves sensitivity and speed of chimera  
727 detection. Bioinformatics 27: 2194-2200. doi: 10.1093/bioinformatics/btr381.
- 728 Ehrenfeld JG, Kourtev P, Huang W (2001) Changes in soil functions following invasions of exotic understory plants  
729 in deciduous forests. Ecol Appl 11: 1287-1300. doi: 10.2307/3060920.
- 730 Geisen S, Briones MJI, Gan HJ, Behan-Pelletier VM, Friman VP, de Groot GA, et al. (2019) A methodological  
731 framework to embrace soil biodiversity. Soil Biol Biochem 136. doi: 10.1016/j.soilbio.2019.107536.
- 732 Gonzalez JM, Portillo MC, Belda-Ferre P, Mira A (2012) Amplification by PCR Artificially Reduces the Proportion  
733 of the Rare Biosphere in Microbial Communities. PLoS ONE 7. doi: 10.1371/journal.pone.0029973.
- 734 Griffiths BS, Díaz-Raviña M, Ritz K, McNicol JW, Ebbelwhite N, Bååth E (1997) Community DNA hybridisation  
735 and %G+C profiles of microbial communities from heavy metal polluted soils. FEMS Microbiol Ecol 24:  
736 103-112. doi: 10.1016/S0168-6496(97)00050-0.
- 737 Hamayun M, Khan SA, Khan AL, Rehman G, Kim YH, Iqbal I, et al. (2010) Gibberellin production and plant  
738 growth promotion from pure cultures of *Cladosporium* sp MH-6 isolated from cucumber (*Cucumis sativus*  
739 *L.*). Mycologia 102: 989-995. doi: 10.3852/09-261.
- 740 Hannula SE, Morrien E, de Hollander M, van der Putten WH, van Veen JA, de Boer W (2017) Shifts in rhizosphere  
741 fungal community during secondary succession following abandonment from agriculture. ISME J 11: 2294-  
742 2304. doi: 10.1038/ismej.2017.90.
- 743 Harkes P, Suleiman AKA, van den Elsen SJJ, de Haan JJ, Holterman M, Kuramae EE, et al. (2019) Conventional  
744 and organic soil management as divergent drivers of resident and active fractions of major soil food web  
745 constituents. Sci Rep 9: 13521. doi: 10.1038/s41598-019-49854-y.



- 746 Harkes P, Verhoeven A, Sterken MG, Snoek LB, van den Elsen SJJ, Mooijman PJW, et al. (2017) The differential  
747 impact of a native and a non-native ragwort species (Senecioneae) on the first and second trophic level of  
748 the rhizosphere food web. *Oikos* 126: 1790-1803. doi: 10.1111/oik.04530.
- 749 Hejda M, Pyšek P, Jarošík V (2009) Impact of invasive plants on the species richness, diversity and composition of  
750 invaded communities. *J Ecol* 97: 393-403. doi: 10.1111/j.1365-2745.2009.01480.x.
- 751 Holterman M, Karegar A, Mooijman P, van Megen H, van den Elsen S, Vervoort MTW, et al. (2017) Disparate gain  
752 and loss of parasitic abilities among nematode lineages. *PLoS ONE* 12. doi: 10.1371/journal.pone.0185445.
- 753 Jaklitsch WM, Checa J, Blanco MN, Olariaga I, Tello S, Voglmayr H (2018) A preliminary account of the  
754 Cucurbitariaceae. *Stud Mycol*: 71-118. doi: 10.1016/j.simyco.2017.11.002.
- 755 Koyama A, Maherali H, Antunes PM (2019) Plant geographic origin and phylogeny as potential drivers of  
756 community structure in root-inhabiting fungi. *J Ecol* 107: 1720-1736. doi: 10.1111/1365-2745.13143.
- 757 Leps J, Hadincova V (1992) How Reliable Are Our Vegetation Analyses. *J Veg Sci* 3: 119-124. doi:  
758 10.2307/3236006.
- 759 Li Y, Tsay T, Chen P (2014) Using three fungivorous nematodes to control lettuce damping-off disease caused by  
760 *Rhizoctonia solani* (AG4). *Plant Pathol Bull* 23: 43-53.
- 761 Lofgren LA, Uehling JK, Branco S, Bruns TD, Martin F, Kennedy PG (2019) Genome-based estimates of fungal  
762 rDNA copy number variation across phylogenetic scales and ecological lifestyles. *Mol Ecol* 28: 721-730.  
763 doi: 10.1111/mec.14995.
- 764 Lorenzo P, Rodriguez-Echeverria S, Gonzalez L, Freitas H (2010) Effect of invasive *Acacia dealbata* Link on soil  
765 microorganisms as determined by PCR-DGGE. *Appl Soil Ecol* 44: 245-251. doi:  
766 10.1016/j.apsoil.2010.01.001.
- 767 Montgomery HJ, Monreal CM, Young JC, Seifert KA (2000) Determination of soil fungal biomass from soil  
768 ergosterol analyses. *Soil Biol Biochem* 32: 1207-1217. doi: 10.1016/S0038-0717(00)00037-7.
- 769 Newell SY, Fallon RD (1991) Toward a method for measuring instantaneous fungal growth rates in field samples.  
770 *Ecology* 72: 1547-1559. doi: 10.2307/1940954.
- 771 Okada H, Kadota I (2003) Host status of 10 fungal isolates for two nematode species, *Filenchus misellus* and  
772 *Aphelenchus avenae*. *Soil Biol Biochem* 35: 1601-1607. doi: 10.1016/j.soilbio.2003.08.004.
- 773 Oostenbrink M (1960) Estimating nematode populations by some selected methods. *Nematology* 6: 85-102.
- 774 Pakpour S, Klironomos J (2015) The invasive plant, *Brassica nigra*, degrades local mycorrhizas across a wide  
775 geographical landscape. *R Soc Open Sci* 2: 150300. doi: 10.1098/rsos.150300.
- 776 Paul D, Park KS (2013) Identification of Volatiles Produced by *Cladosporium cladosporioides* CL-1, a Fungal  
777 Biocontrol Agent That Promotes Plant Growth. *Sensors-Basel* 13: 13969-13977. doi: 10.3390/s131013969.
- 778 Pirozynski KA, Dalpe Y (1989) Geological History of the Glomaceae with Particular Reference to Mycorrhizal  
779 Symbiosis. *Symbiosis* 7: 1-36.
- 780 Pyšek P, Richardson DM, Rejmánek M, Webster GL, Williamson M, Kirschner J (2004) Alien plants in checklists  
781 and floras: towards better communication between taxonomists and ecologists. *Taxon* 53: 131-143. doi:  
782 10.2307/4135498.



- 783 Quist CW, Vervoort MTW, Van Megen H, Gort G, Bakker J, Van der Putten WH, et al. (2014) Selective alteration  
784 of soil food web components by invasive giant goldenrod *Solidago gigantea* in two distinct habitat types.  
785 *Oikos* 123: 837-845. doi: 10.1111/Oik.01067.
- 786 Raja HA, Miller AN, Pearce CJ, Oberlies NH (2017) Fungal Identification Using Molecular Tools: A Primer for the  
787 Natural Products Research Community. *J Nat Prod* 80: 756-770. doi: 10.1021/acs.jnatprod.6b01085.
- 788 Richardson DM, Pyšek P, Rejmánek M, Barbour MG, Panetta FD, West CJ (2000) Naturalization and invasion of  
789 alien plants: concepts and definitions. *Divers Distrib* 6: 93-107.
- 790 Rognes T, Flouri T, Nichols B, Quince C, Mahé F (2016) VSEARCH: a versatile open source tool for  
791 metagenomics. *PeerJ* 4: e2584.
- 792 Roper M, Ellison C, Taylor JW, Glass NL (2011) Nuclear and genome dynamics in multinucleate ascomycete fungi.  
793 *Current Biology* 21: R786-R793. doi: 10.1016/j.cub.2011.06.042.
- 794 Ruess L, Zapata EJG, Dighton J (2000) Food preferences of a fungal-feeding *Aphelenchoides* species. *Nematology*  
795 2: 223-230. doi: 10.1163/156854100508962.
- 796 Sandoval-Denis M, Gene J, Sutton DA, Wiederhold NP, Cano-Lira JF, Guarro J (2016) New species of  
797 *Cladosporium* associated with human and animal infections. *Persoonia* 36: 281-298. doi:  
798 10.3767/003158516x691951.
- 799 Scharfy D, Güsewell S, Gessner MO, Venterink HO (2010) Invasion of *Solidago gigantea* in contrasting  
800 experimental plant communities: effects on soil microbes, nutrients and plant–soil feedbacks. *J Ecol* 98:  
801 1379-1388. doi: 10.1111/j.1365-2745.2010.01722.x.
- 802 Segata N, Izard J, Waldron L, Gevers D, Miropolsky L, Garrett WS, et al. (2011) Metagenomic biomarker discovery  
803 and explanation. *Genome Biol* 12: R60. doi: 10.1186/gb-2011-12-6-r60.
- 804 Stefanowicz AM, Stanek M, Nobis M, Zubek S (2016) Species-specific effects of plant invasions on activity,  
805 biomass, and composition of soil microbial communities. *Biol Fert Soils* 52: 841-852. doi: 10.1007/s00374-  
806 016-1122-8.
- 807 Vallino M, Massa N, Lumini E, Bianciotto V, Berta G, Bonfante P (2006) Assessment of arbuscular mycorrhizal  
808 fungal diversity in roots of *Solidago gigantea* growing in a polluted soil in Northern Italy. *Environ*  
809 *Microbiol* 8: 971-983. doi: 10.1111/j.1462-2920.2006.00980.x.
- 810 Vanderhoeven S, Dassonville N, Chapuis-Lardy L, Hayez M, Meerts P (2006) Impact of the invasive alien plant  
811 *Solidago gigantea* on primary productivity, plant nutrient content and soil mineral nutrient concentrations.  
812 *Plant Soil* 286: 259-268.
- 813 Vervoort MTW, Vonk JA, Mooijman PJW, Van den Elsen SJJ, Van Megen HHB, Veenhuizen P, et al. (2012) SSU  
814 ribosomal DNA-based monitoring of nematode assemblages reveals distinct seasonal fluctuations within  
815 evolutionary heterogeneous feeding guilds. *PLoS ONE* 7: e47555. doi: 10.1371/journal.pone.0047555.
- 816 Vilà M, Espinar JL, Hejda M, Hulme PE, Jarosik V, Maron JL, et al. (2011) Ecological impacts of invasive alien  
817 plants: a meta-analysis of their effects on species, communities and ecosystems. *Ecol Lett* 14: 702-708. doi:  
818 10.1111/j.1461-0248.2011.01628.x.

- 819 Wang CY, Jiang K, Liu J, Zhou JW, Wu BD (2018) Moderate and heavy *Solidago canadensis* L. invasion are  
820 associated with decreased taxonomic diversity but increased functional diversity of plant communities in  
821 East China. *Ecol Eng* 112: 55-64. doi: 10.1016/j.ecoleng.2017.12.025.
- 822 Wardle DA, Bardgett RD, Klironomos JN, Setälä H, Van der Putten WH, Wall DH (2004) Ecological linkages  
823 between aboveground and belowground biota. *Science* 304: 1629-1633. doi: 10.1126/science.1094875.
- 824 Weber E (1998) The Dynamics of Plant Invasions: A Case Study of Three Exotic Goldenrod Species (*Solidago* L.) in  
825 Europe. *J Biogeogr* 25: 147-154. doi: 10.2307/2846283.
- 826 Weber E, Jakobs G (2005) Biological flora of central Europe: *Solidago gigantea* Aiton. *Flora* 200: 109-118. doi:  
827 10.1016/j.flora.2004.09.001.
- 828 Weete JD, Abril M, Blackwell M (2010) Phylogenetic Distribution of Fungal Sterols. *PLoS ONE* 5. doi:  
829 10.1371/journal.pone.0010899.
- 830 Xiao HF, Feng YL, Schaefer DA, Yang XD (2014) Soil fungi rather than bacteria were modified by invasive plants,  
831 and that benefited invasive plant growth. *Plant Soil* 378: 253-264. doi: 10.1007/s11104-014-2040-x.
- 832 Yuan YG, Tang JJ, Leng D, Hu SJ, Yong JWH, Chen X (2014) An Invasive Plant Promotes Its Arbuscular  
833 Mycorrhizal Symbioses and Competitiveness through Its Secondary Metabolites: Indirect Evidence from  
834 Activated Carbon. *PLoS ONE* 9. doi: 10.1371/journal.pone.0097163.
- 835 Zubek S, Majewska ML, Błazzkowski J, Stefanowicz AM, Nobis M, Kapusta P (2016) Invasive plants affect  
836 arbuscular mycorrhizal fungi abundance and species richness as well as the performance of native plants  
837 grown in invaded soils. *Biology and Fertility of Soils* 52: 879-893. doi: 10.1007/s00374-016-1127-3.
- 838 Wardle DA, Bardgett RD, Klironomos JN, Setälä H, Van der Putten WH, Wall DH (2004) Ecological linkages  
839 between aboveground and belowground biota. *Science* 304: 1629-1633. doi: 10.1126/science.1094875.
- 840 Weber E (1998) The Dynamics of Plant Invasions: A Case Study of Three Exotic Goldenrod Species (*Solidago* L.) in  
841 Europe. *Journal of Biogeography* 25: 147-154. doi: 10.2307/2846283.
- 842 Weber E, Jakobs G (2005) Biological flora of central Europe: *Solidago gigantea* Aiton. *Flora - Morphology,*  
843 *Distribution, Functional Ecology of Plants* 200: 109-118. doi: 10.1016/j.flora.2004.09.001.
- 844 Weete JD, Abril M, Blackwell M (2010) Phylogenetic Distribution of Fungal Sterols. *PLoS ONE* 5, e10899. doi:  
845 10.1371/journal.pone.0010899.
- 846 Xiao HF, Feng YL, Schaefer DA, Yang XD (2014) Soil fungi rather than bacteria were modified by invasive plants,  
847 and that benefited invasive plant growth. *Plant Soil* 378: 253-264. doi: 10.1007/s11104-014-2040-x.
- 848 Yuan YG, Tang JJ, Leng D, Hu SJ, Yong JWH, Chen X (2014) An Invasive Plant Promotes Its Arbuscular  
849 Mycorrhizal Symbioses and Competitiveness through Its Secondary Metabolites: Indirect Evidence from  
850 Activated Carbon. *PLoS ONE* 9, e97163. doi: 10.1371/journal.pone.0097163.
- 851 Zubek S, Majewska ML, Błazzkowski J, Stefanowicz AM, Nobis M, Kapusta P (2016) Invasive plants affect  
852 arbuscular mycorrhizal fungi abundance and species richness as well as the performance of native plants  
853 grown in invaded soils. *Biol Fert Soils* 52: 879-893. doi: 10.1007/s00374-016-1127-3.

854 **Author Contributions**

855 M.T.W.V., C.W.Q. and J.H. were responsible for the experimental design. L.J.M.v.H., M.T.W.V.  
856 and C.W.Q. collected the soil samples. L.J.M.v.H. and S.J.J.v.d.E. isolated nematode DNA and  
857 performed the nematode qPCR assays. L.J.M.v.H. measured soil abiotic characters. M.H.M.H.  
858 and P.J.W.M. developed fungal qPCR primers. P.H. tested fungal qPCR assays. P.H., L.J.M.v.H.  
859 isolated bacterial and fungal DNA. P.H. performed the bacterial and fungal qPCR assays. P.H.  
860 performed the ergosterol measurements. G.G. performed the statistical analysis in SAS on the  
861 qPCR and ergosterol data. P.H. performed the two step PCR reactions in order to prepare the  
862 sequence library. J.J.M.v.S analysed the fungal sequence data and performed the statistical  
863 analysis. P.H. and J.H. wrote the manuscript; all others co-commented on the manuscript.

864

865 **Competing interest**

866 The authors declare no competing interests.



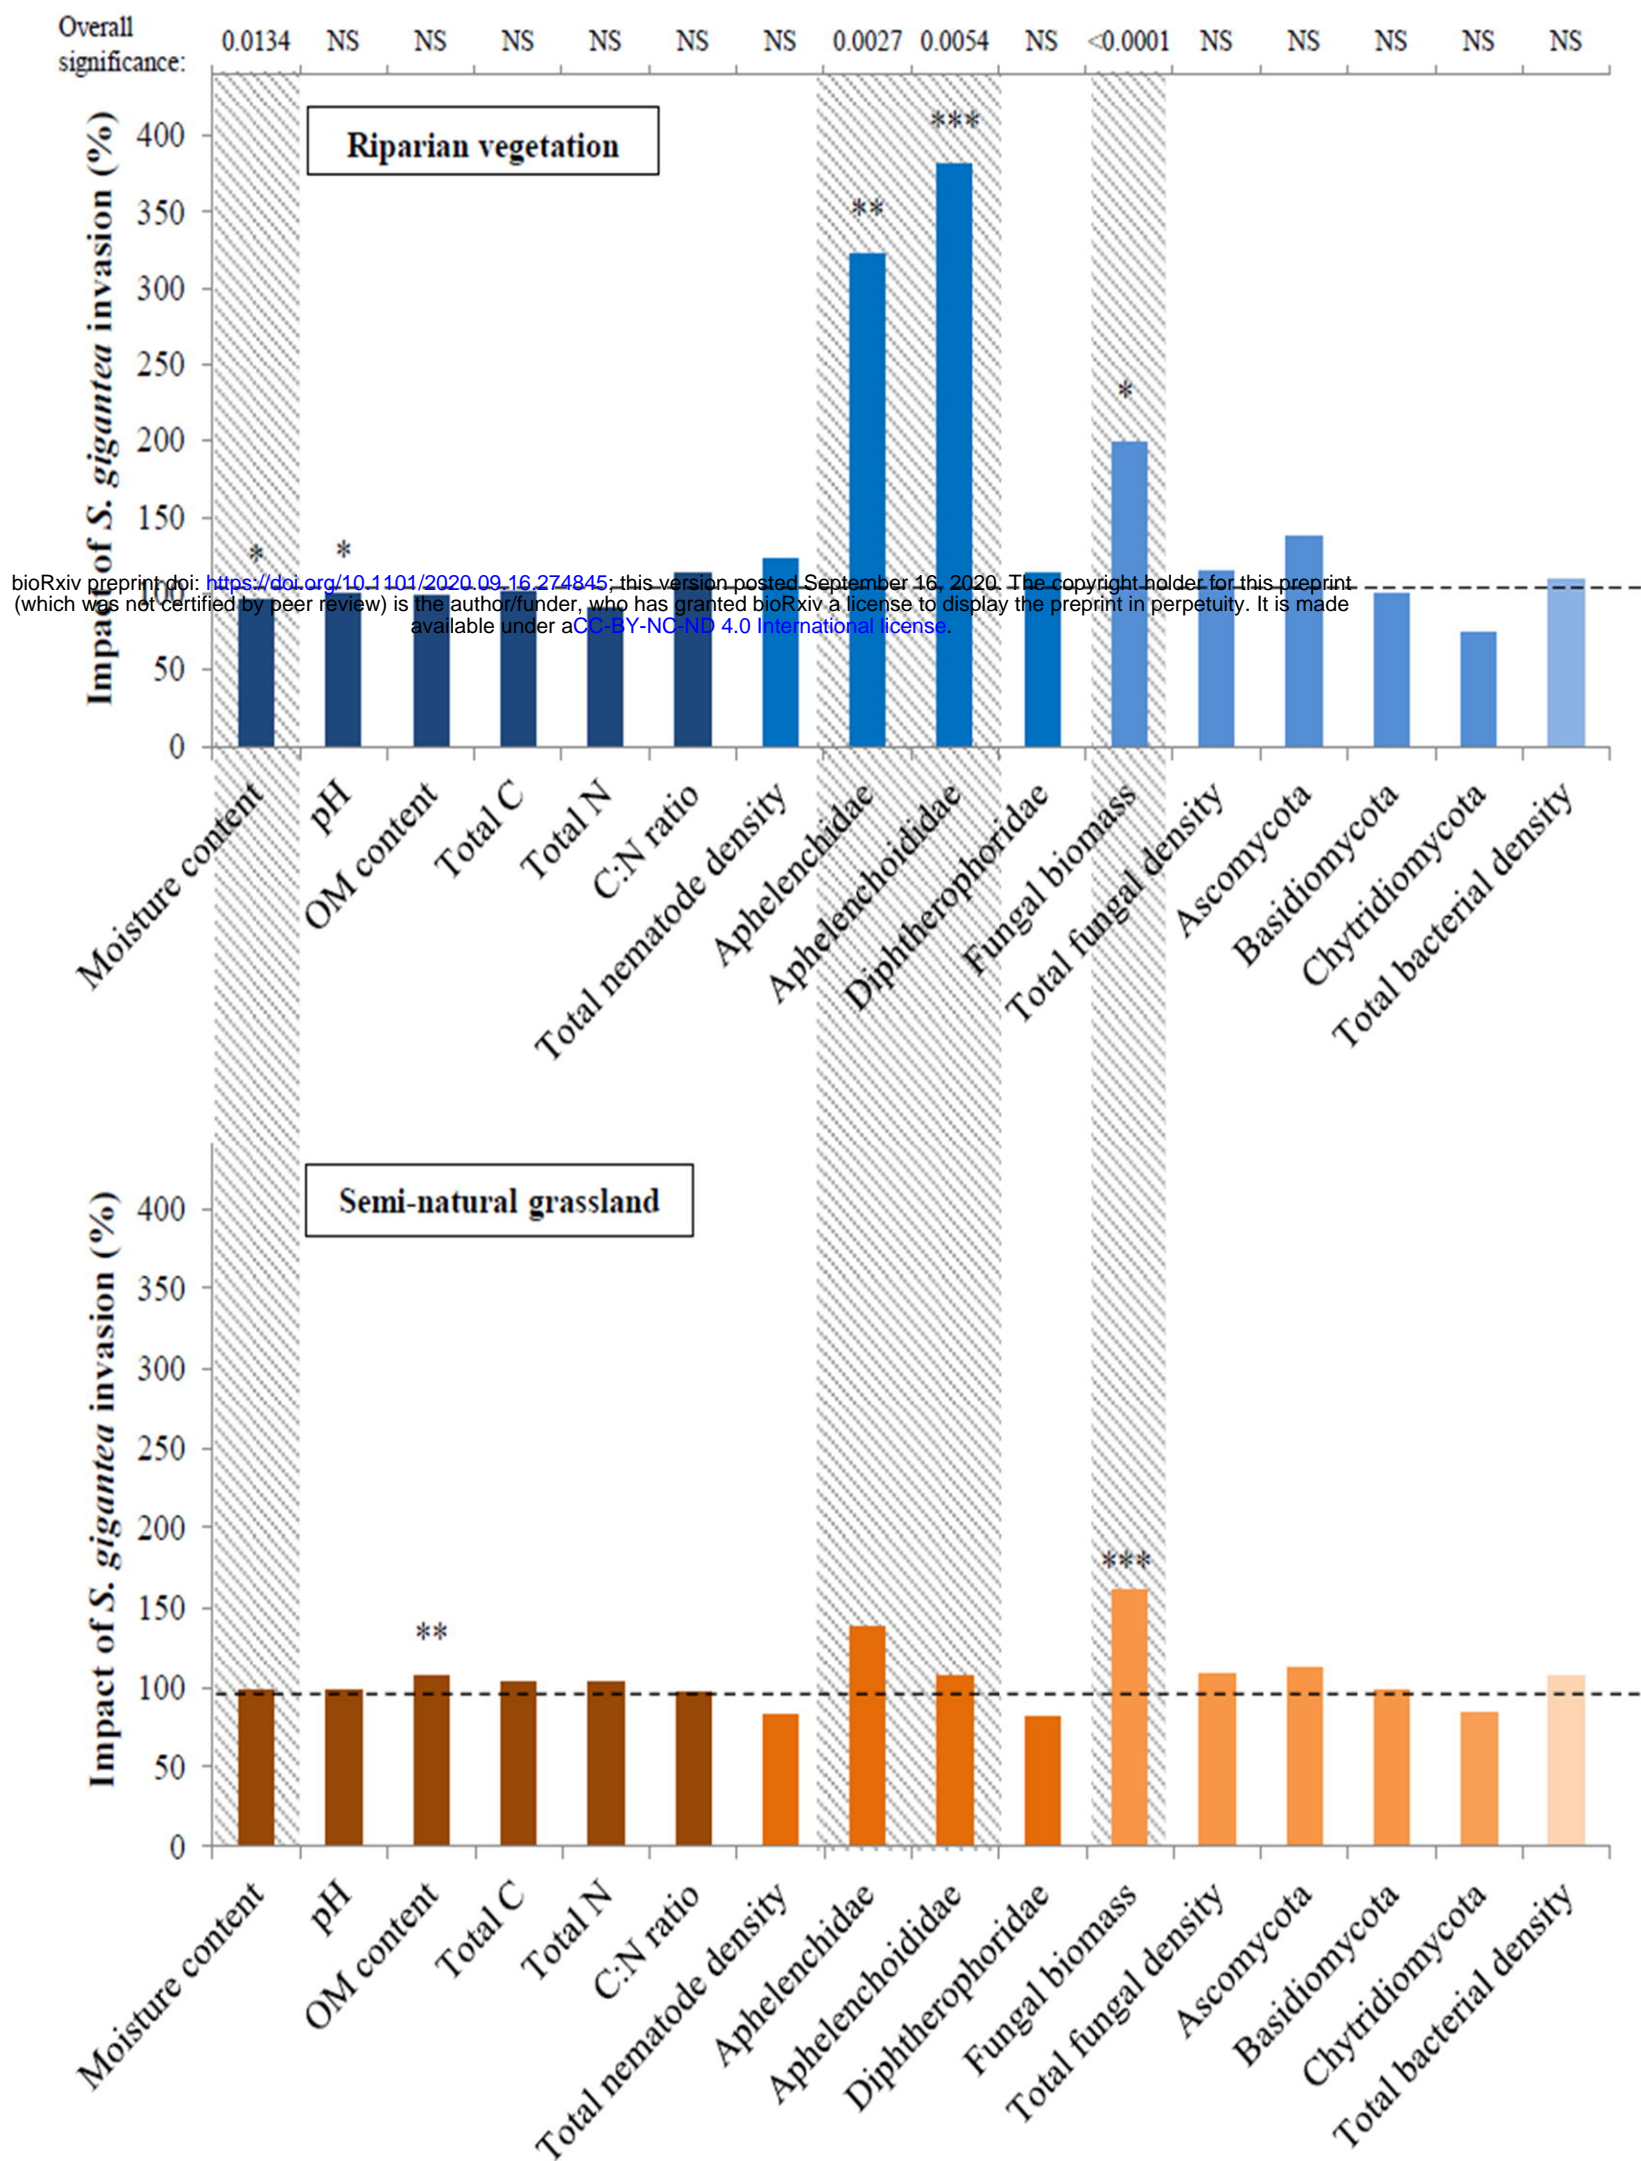

**Figure 1. Impact of *S. gigantea* invasion in riparian vegetation (top) and semi-natural grassland habitat.** The impact of *S. gigantea* invasion on the y-axis was calculated by dividing estimated means (Table 3) from invaded plots by estimated means from un-invaded plots and expressed as a percentage. Impacts are shown for the 6 abiotic variables, the total nematode density, densities of three fungivorous nematodes, total fungal density, densities of three fungal phyla and the total bacterial density (no invasion impact = 100%). Asterisks indicate significant differences (\* $P < 0.05$ , \*\* $P < 0.01$ , \*\*\* $P < 0.001$ ) between invaded and un-invaded plots per habitat type. Variables showing an overall significant invasion effect, for both habitats together, are indicated by a grey-shaded background. Corresponding P-values are shown at the top part of the figure (NS=not significant). Riparian vegetation habitats included 3 study sites and 24 plot-pairs, while semi-natural grasslands included 5 study sites and 28 plot-pairs.

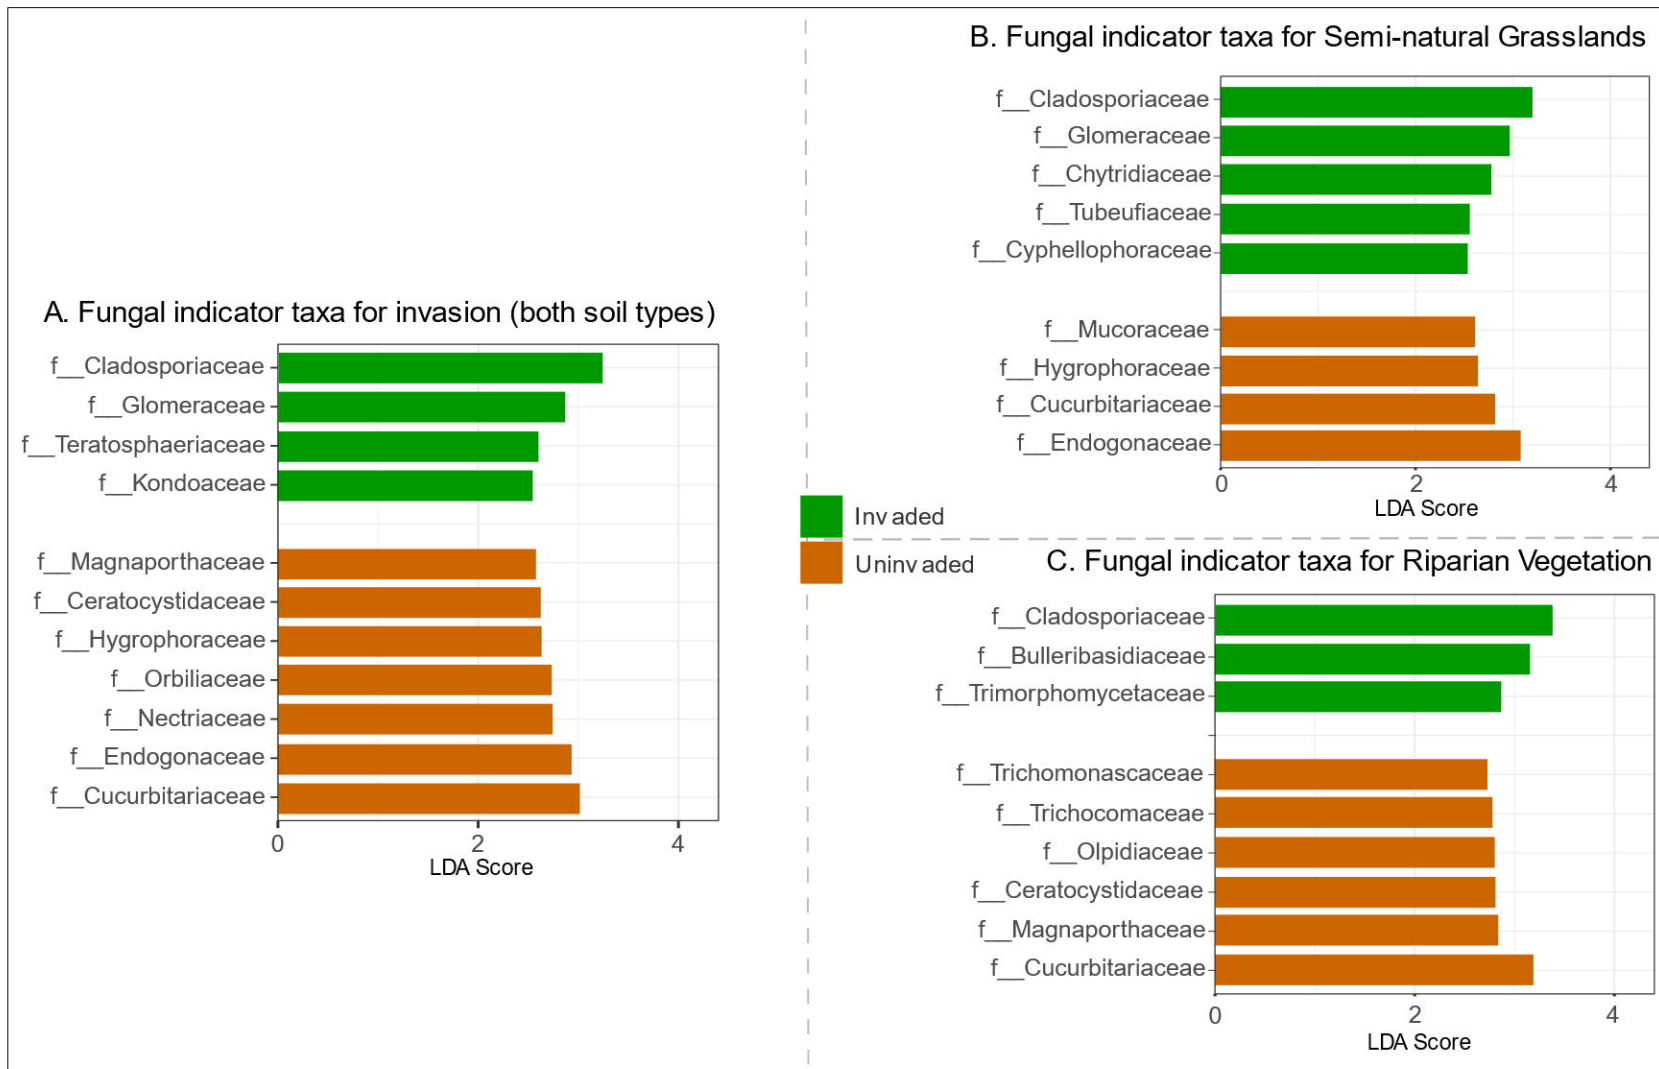

**Figure 2:** Discriminant fungal families indicated by LEfSe analysis (LDA threshold of 2) resulting from invaded (green) and uninvaded (brown) soils by *Solidago gigantea*.
